# Supplementary material for: Cross-Feeding and Enzymatic Catabolism for Mannan-Oligosaccharide Utilization by the Butyrate-Producing Gut Bacterium Roseburia hominis A2-183
Source: MDPI journal article supplement (doi:10.3390/microorganisms10122496), 2022-12-16
Supplement: s1 [file s1]

# Cross-Feeding and Enzymatic Catabolism for Mannan-Oligosaccharide Utilization by the Butyrate-Producing Gut Bacterium *Roseburia hominis* A2-183

Abhishek Bhattacharya <sup>1,\*†</sup>, Lovisa Majtorp <sup>1,†</sup>, Simon Birgersson <sup>1</sup>, Mathias Wiemann <sup>1</sup>, Krishnan Sreenivas <sup>2</sup>, Phebe Verbrugghe <sup>3</sup>, Olivier Van Aken <sup>4</sup>, Ed W. J. Van Niel <sup>2</sup> and Henrik Ståhlbrand <sup>1,\*</sup>

<sup>1</sup> Division of Biochemistry and Structural Biology, Department of Chemistry, Lund University, Naturvetarvägen 14, 221 00 Lund, Sweden

<sup>2</sup> Applied Microbiology, Department of Chemistry, Lund University, Naturvetarvägen 14, 221 00 Lund, Sweden

<sup>3</sup> Department of Food Technology, Engineering and Nutrition, Lund University, Naturvetarvägen 14, 221 00 Lund, Sweden

<sup>4</sup> Department of Biology, Lund University, Sölvegatan 35, 223 62 Lund, Sweden

\* Correspondence: abhishek.bhattacharya@biochemistry.lu.se (A.B.); henrik.stalbrand@biochemistry.lu.se (H.S.)

† These authors contributed equally to this work.

**Table S1. Amino acid sequence similarity between *R. hominis* target proteins involved in this study with *R. intestinalis* and predicted functional annotation and localisation of *R. hominis* proteins.**

| <i>Roseburia hominis</i> A2-183              |                                                          |                                          |                      | <i>Roseburia intestinalis</i> L1-82 |                                 |                                                                                                      |
|----------------------------------------------|----------------------------------------------------------|------------------------------------------|----------------------|-------------------------------------|---------------------------------|------------------------------------------------------------------------------------------------------|
| Locus tag/RefSeq protein id                  | GH families/Putative function                            | Predicted cellular location <sup>4</sup> | Protein Abbreviation | Query Coverage (%) / Identity (%)   | Locus tag/GenBank protein id    | Description/Function                                                                                 |
| RHOM_RS11115/<br>WP_014080403.1 <sup>1</sup> | GH3/ $\beta$ -hexosaminidase                             | Transmembrane                            | <i>Rh</i> GH3        | 99.0/65.15                          | ROSINTL182_05537/<br>EEV02519.1 | Predicted GH3/ $\beta$ -hexosaminidase                                                               |
| RHOM_RS11120/<br>WP_014080404.1 <sup>1</sup> | GH1/ $\beta$ -glucosidase /mannose-6-phosphate isomerase | Intracellular                            | <i>Rh</i> GH1-M6P    | 99.0/83.8                           | ROSINTL182_05469-70/VCV21232.1  | GH1/ mannose-6-phosphate isomerase (Biochemically characterized) <sup>5</sup>                        |
| RHOM_RS11125/<br>WP_014080405.1 <sup>1</sup> | CE1/acetyl esterase                                      | Intracellular                            | <i>Rh</i> CE1        | 99.0/65.03                          | ROSINTL182_05471/<br>(6HH9_A)   | Acetyl esterase (Biochemically characterized) <sup>5</sup>                                           |
| RHOM_RS11130/<br>WP_014080406.1              | CE2/acetyl esterase                                      | Intracellular                            | <i>Rh</i> CE2        | 98.0/67.92                          | ROSINTL182_05473/<br>VCV21230.1 | Acetyl esterase (Biochemically characterized) <sup>5</sup>                                           |
| RHOM_RS11135/<br>WP_014080407.1 <sup>1</sup> | GH130_2/ $\beta$ -mannoside phosphorylase                | Intracellular                            | <i>Rh</i> MOP130A    | 100.0/94.41                         | ROSINTL182_05474/<br>EEV02551.1 | GH130_2/ $\beta$ -1,4-mannooligosaccharide phosphorylase (Biochemically characterized) <sup>5</sup>  |
| RHOM_RS11140/<br>WP_014080408.1 <sup>1</sup> | GH130_1/4-O- $\beta$ -D-mannosyl-D-glucose phosphorylase | Intracellular                            | <i>Rh</i> MGP130     | 98.0/94.57                          | ROSINTL182_05475/<br>VCV21228.1 | GH130_1/ 4-O- $\beta$ -D-mannosyl-D-glucose phosphorylase (Biochemically characterized) <sup>5</sup> |
| RHOM_RS11145/<br>WP_014080409.1 <sup>1</sup> | Mannobiose 2-epimerase                                   | Intracellular                            | <i>Rh</i> Mep        | 99.0/77.6                           | ROSINTL182_05476/<br>EEV02553.1 | Mannobiose 2-epimerase (Biochemically characterized) <sup>5</sup>                                    |
| RHOM_RS11150/<br>WP_014080410.1 <sup>1</sup> | ABC transporter permease protein                         | Transmembrane                            | <i>Rh</i> MPP1       | 100.0/79.9                          | ROSINTL182_05477/<br>EEV02554.1 | ABC transporter permease protein                                                                     |
| RHOM_RS11155/<br>WP_014080411.1 <sup>1</sup> | ABC transporter permease protein                         | Transmembrane                            | <i>Rh</i> MPP2       | 94.0/77.2                           | ROSINTL182_05478/<br>EEV02555.1 | ABC transporter permease protein                                                                     |

|                                              |                                      |                           |                      |           |                                 |                                                                              |
|----------------------------------------------|--------------------------------------|---------------------------|----------------------|-----------|---------------------------------|------------------------------------------------------------------------------|
| RHOM_RS11160/<br>WP_014080412.1 <sup>1</sup> | ABC Substrate-binding protein        | Secreted (signal) peptide | <i>RhMosBP</i>       | 99.0/65.0 | ROSINTL182_05479/<br>EEV02556.1 | ABC Substrate-binding protein (Thermodynamically characterized) <sup>5</sup> |
| RHOM_RS11165/<br>WP_044024994.1 <sup>1</sup> | Unidentified function                | Intracellular             | Unidentified protein | 30.0/32.6 | ROSINTL182_08687/<br>EEU99425.1 | Transcriptional regulator                                                    |
| RHOM_RS11170/<br>WP_014080414.1 <sup>1</sup> | Transcriptional regulator            | Intracellular             | TR                   | 98.0/64.7 | ROSINTL182_05480/<br>EEV02557.1 | Transcriptional regulator                                                    |
| RHOM_RS11175/<br>WP_014080415.1 <sup>1</sup> | GH36, $\alpha$ -galactosidase        | Intracellular             | <i>RhGal36A</i>      | 99.0/70.1 | ROSINTL182_05481/<br>EEV02558.1 | GH36, $\alpha$ -galactosidase (Biochemically characterized) <sup>5</sup>     |
| RHOM_RS11180/WP_014080416.1 <sup>1</sup>     | Phosphomanno-mutase                  | Intracellular             | <i>RhPmm</i>         | 99.0/91.4 | ROSINTL182_05482/<br>EEV02559.1 | Phosphomanno-mutase (Biochemically characterized)                            |
| RHOM_RS14610/<br>WP_014081071.1 <sup>2</sup> | GH113A, $\beta$ -mannoside hydrolase | Intracellular             | <i>RhMan113A</i>     | 96.0/59.9 | ROSINTL182_05483/<br>EEV02560.1 | GH113, $\beta$ -mannanase (Biochemically characterized) <sup>5</sup>         |
| RHOM_RS05895/<br>WP_044024878.1 <sup>2</sup> | GH27, $\alpha$ -galactosidase        | Intracellular             | <i>RhGal27</i>       | 92.0/62.0 | ROSINTL182_03125/<br>EEV02431.1 | GH27, predicted $\alpha$ -galactosidase                                      |
| RHOM_RS06295/<br>WP_014079449.1 <sup>2</sup> | GH36, $\alpha$ -galactosidase        | Intracellular             | <i>RhGal36B</i>      | 98.0/69.9 | ROSINTL182_05846/<br>EEV02235.1 | GH36, predicted $\alpha$ -galactosidase                                      |
| RHOM_RS13400/<br>WP_014080837.1 <sup>3</sup> | Butyryl-CoA: acetate CoA-transferase | Intracellular             | <i>RhBCoA</i>        | 94.0/100  | ROSINTL182_07121/<br>EEV00989.1 | Predicted butyryl-CoA: acetate CoA-transferase                               |
| RHOM_RS15425/<br>WP_014081204.1 <sup>3</sup> | L-lactate dehydrogenase              | Intracellular             | <i>RhLDH</i>         | 98.0/65.3 | ROSINTL182_05160/<br>EEV02890.1 | Predicted L-lactate dehydrogenase                                            |

Proteins putatively involved in MOS/GMOS utilisation, encoded by locus <sup>1</sup>*RhMosUL* (RHOM\_RS11115- RS11180) or <sup>2</sup>distally were selected together with proteins putatively involved in synthesis of <sup>3</sup>short-chain fatty acids (SCFAs). <sup>4</sup>The presence of signal peptides and transmembrane sequences was carried out using Signal P6 (<https://services.healthtech.dtu.dk/service.php?SignalP>) and DeepSig (<https://deepsig.biocomp.unibo.it/welcome/default/index>), respectively. <sup>5</sup>Biochemical characterisation as reported in La Rosa et al., 2019.

The amino acid sequences were retrieved from the RefSeq protein database (<https://www.ncbi.nlm.nih.gov/refseq/>). BLASTp (BLOSUM 62-matrix) of NCBI (National Center for Biotechnology Information) was used for analysing the amino acid sequence similarity of target proteins in *R. hominis* A2-183 with *R. intestinalis* L1-82 using the default threshold e-value of 1e-5. The functional annotation for the *R. hominis* target proteins was predicted based on the high sequence similarity to the homologs in *R. intestinalis*. The GH family information was based on the Carbohydrate-Active enzymes (CAZy) database (<http://www.cazy.org/bB.html>). The proteins involved in SCFAs production were selected based on information obtained from Riviere et al., 2015 and the pathway database Kyoto Encyclopaedia of Genes and Genomes (KEGG) (<https://www.genome.jp/kegg/>) and BioCyc (<https://www.biocyc.org/>).

**Table S2. Primers designed and used in this study for quantitative PCR analysis (qPCR) in analysis of population dynamics**

| Organism                                     | Locus tag                                                     | Primer sequences       |                        | Annealing temperature (°C) | Amplicon length (bp) | Efficiency (E) | C <sub>T</sub> value, genomic DNA of <i>R. hominis</i> | C <sub>T</sub> value genomic DNA of <i>B. adolescentis</i> |
|----------------------------------------------|---------------------------------------------------------------|------------------------|------------------------|----------------------------|----------------------|----------------|--------------------------------------------------------|------------------------------------------------------------|
|                                              |                                                               | Forward primer (5'→3') | Reverse primer (5'→3') |                            |                      |                |                                                        |                                                            |
| <i>Roseburia hominis</i> A2-183 (DSMZ 16839) | RHOM_RS09380, <i>rho</i> , Transcriptional termination factor | CGGAAGCAAGATGGACGAC    | CGATGGCAGGGAACACAC     | 58                         | 107                  | 1.98           | 19.8                                                   | N.D                                                        |
| <i>B. adolescentis</i> ATCC 15703            | BAD_RS05455, <i>recA</i> , Recombination protein              | GAAGGCGAGATGGGAGACAG   | TGATGAAGATGGCGGTGGT    | 58                         | 112                  | 1.98           | N.D                                                    | 19.5                                                       |

The primers were designed based on the whole genome sequences of *R. hominis* A2-183 DSMZ 16839 (BioProject accession number PRJNA33399) and *B. adolescentis* ATCC 15703 (BioProject accession number PRJNA16321). N.D, not determined by qPCR. Forward and reverse primers were used at 0.3μM. The primers were designed using Primer3 plus software (<https://www.bioinformatics.nl/cgi-bin/primer3plus/primer3plus.cgi>), the primer parameters (GC content, melting temperature, GC clamps, cross-dimers, self-dimers, hairpins) were checked using Beacon designer (<http://www.premierbiosoft.com/molecularbeacons/>), the *in-silico* analysis for gene and strain specificity was carried out using Primer blast (<https://www.ncbi.nlm.nih.gov/tools/primer-blast/>) and SnapGene (<https://www.snapgene.com/>). The primers were synthesized by GenScript (New Jersey, US). Sso Advanced Universal SYBR Green Supermix (Bio-Rad, Hercules, USA) was used.

**Table S3. Primers designed and used in this study for RT-qPCR analyses of reference and target genes in *Roseburia hominis* A2-183**

| Organism                                  | Locus tag/ abbreviation<br>(putative function) <sup>a</sup>   | Primer sequences <sup>b</sup> |                          | Amplicon length (bp) | Efficiency (E) <sup>d</sup> | C <sub>T</sub> value, genomic DNA of <i>R. hominis</i> |
|-------------------------------------------|---------------------------------------------------------------|-------------------------------|--------------------------|----------------------|-----------------------------|--------------------------------------------------------|
|                                           |                                                               | Forward primer (5'→3')        | Reverse primer (5'→3')   |                      |                             |                                                        |
| <i>Roseburia hominis</i> -Reference genes | RHOM_RS01035/ <i>EF-Tu</i> (Elongation factor-Tu)             | TGCTCAGATGGATGGTGCT           | GACGGGAAAGTAAGATGTGCT    | 86                   | 1.96                        | 19.5                                                   |
|                                           | RHOM_RS04910/ <i>DnaJ</i> (chaperone protein DnaJ)            | ATTCCACCGCACAGATTTC           | CCAGGCTTCACTTCATACAA CA  | 97                   | 1.96                        | 19.3                                                   |
|                                           | RHOM_RS00030/ <i>GyrA2</i> (DNA gyrase subunit A)             | GAAGTGCTACAAGATTACCG AGA      | CGTCCAAGAAGTGCCGTATC     | 138                  | 1.95                        | 19.1                                                   |
|                                           | RHOM_RS09380/ <i>rho</i> (Transcriptional termination factor) | CGGAAGCAAGATGGACGAC           | CGATGGCAGGGAACACAC       | 107                  | 1.97                        | 19.8                                                   |
|                                           | RHOM_RS00995/ <i>rpo</i> (RNA polymerase beta subunit)        | ACAACAAGGAGACTGACGA GA        | TGGCTGACGATAACACGCT      | 115                  | 1.97                        | 20.0                                                   |
|                                           | RHOM_RS14135/ <i>SecY</i> (Preprotein translocase)            | ATTACCTGAACCGAATCCTG AA       | ATACATCCGCACCAAACACA     | 108                  | 1.96                        | 20.7                                                   |
| <i>Roseburia hominis</i> -Target genes    | RHOM_RS11135/ <i>RhMOP130A</i> (β-mannoside phosphorylase)    | GGAGATACAAGGAGAACCC GA        | GCGGAAGACGCCGATGAA       | 111                  | 1.95                        | 20.3                                                   |
|                                           | RHOM_RS11140/ <i>RhMGP130</i> (mannosylglucose phosphorylase) | CCCTGACACCAATCCGCAC           | CGCCACGCCGAAGAAAGA       | 139                  | 1.95                        | 21.0                                                   |
|                                           | RHOM_RS11145/ <i>RhMep</i> (Epimerase)                        | TTACCAGAGAGTTCCAGCCG          | GCAGGGTGTTTCATCGTCTTA TC | 81                   | 1.96                        | 19.3                                                   |
|                                           | RHOM_RS11160/ <i>RhMosBP</i> (ABC-substrate binding protein)  | AAGTGAGTATTTCTGCCGT           | TACCAGTCCGTCGTAATCCC     | 88                   | 1.95                        | 19.8                                                   |
|                                           | RHOM_RS11175/ <i>RhGal36A</i> (α-galactosidase)               | GCACCGTTTGTTCTTCAC            | ATCGCACTCTCCCTGTAATC     | 107                  | 1.97                        | 20.4                                                   |

|                                                                           |                              |                               |     |      |      |
|---------------------------------------------------------------------------|------------------------------|-------------------------------|-----|------|------|
| RHOM_RS14610/ <i>RhMan113</i><br>( $\beta$ -mannoside hydrolase)          | CAGGAACCTTGACCGTATTGA<br>AAG | ATTGTTAGGCACCATTGAGG<br>AA    | 108 | 1.96 | 19.4 |
| RHOM_RS05895/ <i>RhGal27A</i><br>( $\alpha$ -galactosidase)               | GGGAAGAGAAGGAGAGAAG<br>CA    | ACTGTGGTGTCTGTAATAGTC<br>ATAG | 85  | 1.95 | 20.2 |
| RHOM_RS06295/ <i>RhGal36B</i><br>( $\alpha$ -galactosidase)               | CGGAGAATGGAGACAGGGC<br>A     | CCAGCGGAGCAACATCACA<br>C      | 94  | 1.98 | 20.5 |
| RHOM_RS13400/ <i>RhBCoA</i><br>(butyryl-CoA: acetate CoA-<br>transferase) | GCAAAGGCAACACAGAAGG          | ATGTAACCGTATCCACCAAA<br>CA    | 119 | 1.98 | 20.7 |
| RHOM_RS15425/ <i>RhLDH</i><br>(lactate dehydrogenase)                     | GTTGCAGTAATCGGATGTGG         | TGGCATCTATGAGCACCATC          | 94  | 1.96 | 20.  |

<sup>a</sup>The information for gene sequences were retrieved from RefSeq database (<https://www.ncbi.nlm.nih.gov/refseq/>). <sup>b</sup> Forward and reverse primers were used at 0.3  $\mu$ M. The primers were designed using Primer3 plus software (<https://www.bioinformatics.nl/cgi-bin/primer3plus/primer3plus.cgi>), the primer parameters (GC content, melting temperature, GC clamps, cross-dimers, self-dimers, hairpins) were checked using Beacon designer (<http://www.premierbiosoft.com/molecularbeacons/>), the *in-silico* analysis for gene and strain specificity was carried out using Primer blast (<https://www.ncbi.nlm.nih.gov/tools/primer-blast/>) and SnapGene (<https://www.snapgene.com/>). The primers were synthesized by GenScript (New Jersey, US). Sso Advanced Universal SYBR Green Supermix (Bio-Rad, Hercules, USA) was used. <sup>c</sup> *rpoB*, RNA polymerase beta subunit and *recA*, Recombination protein from *R. hominis* and *B. adolescentis*, respectively, were also used *in vitro* for population dynamics analysis using genomic DNA (**Table S2**). <sup>d</sup> The E value shows the PCR amplification efficiency for each primer set.

**Figure S1**

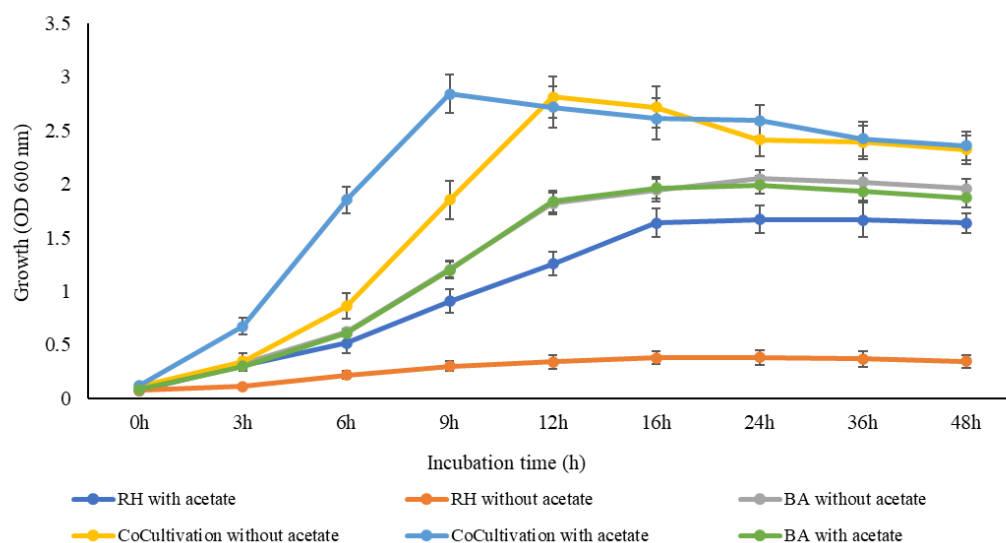

**Figure S1. Growth of *Roseburia hominis* (RH) and *Bifidobacterium adolescentis* (BA) on glucose (10 g/L) as mono- and coculture in the presence and absence of sodium acetate (5 g/L).** Cultivation (100 mL) for monoculture and coculture was carried out using MCB medium (without acetate) and mMCB medium (with acetate). All incubations were carried out at 37 °C for 48 h under anaerobic conditions (Bhattacharya et al., 2021). Growth was monitored by removing aliquots and measuring the optical density at 600nm.

**Figure S2**

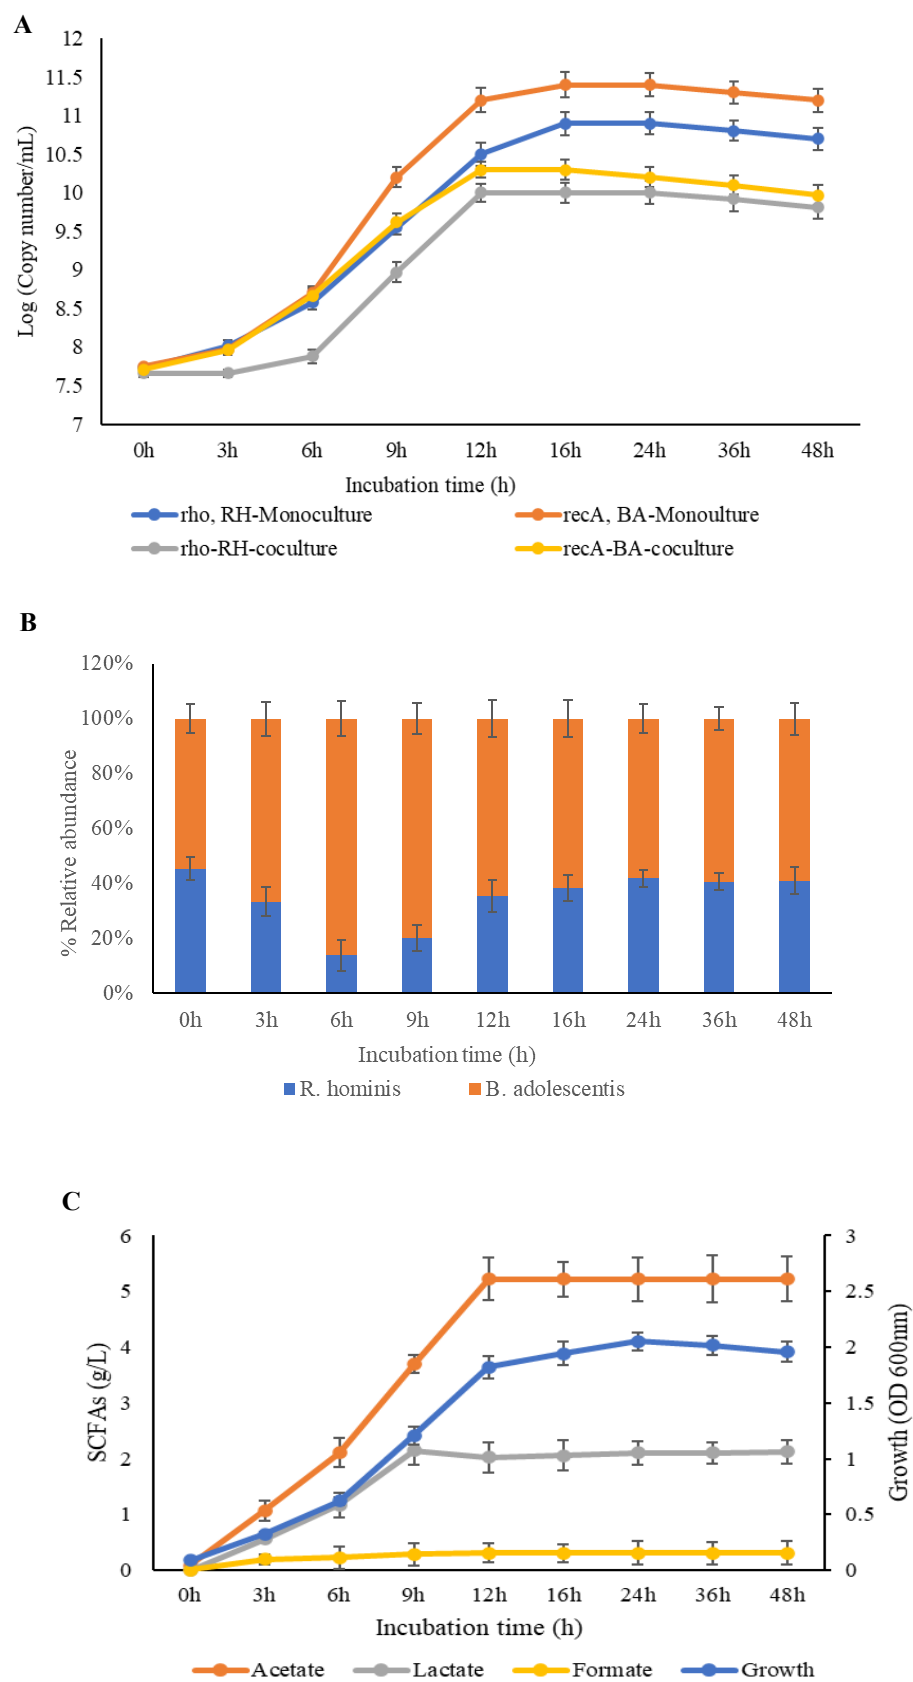



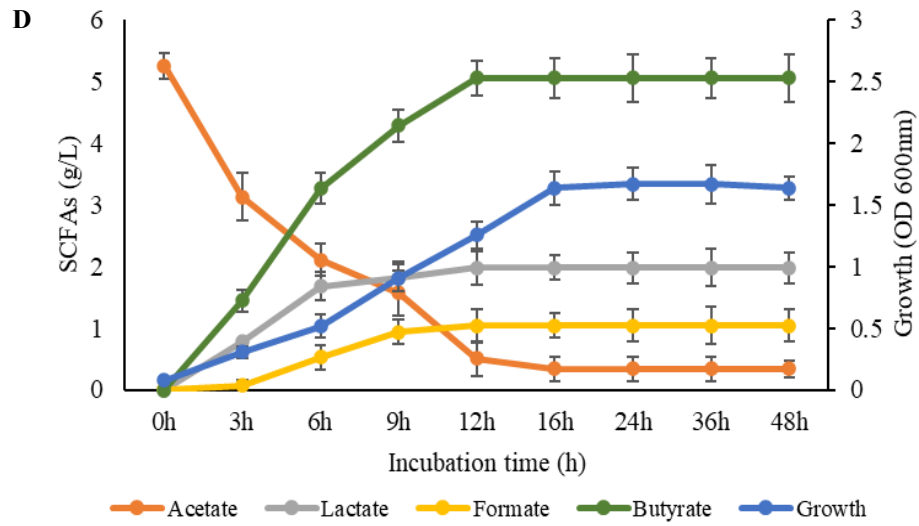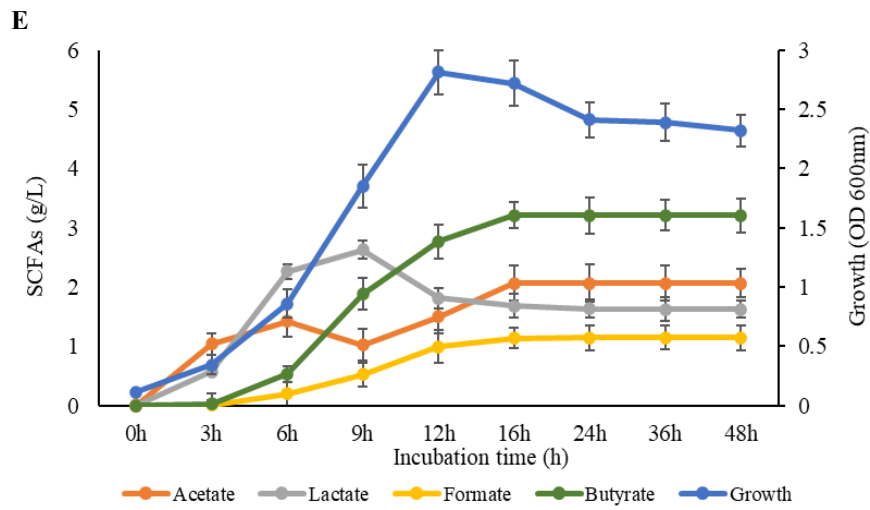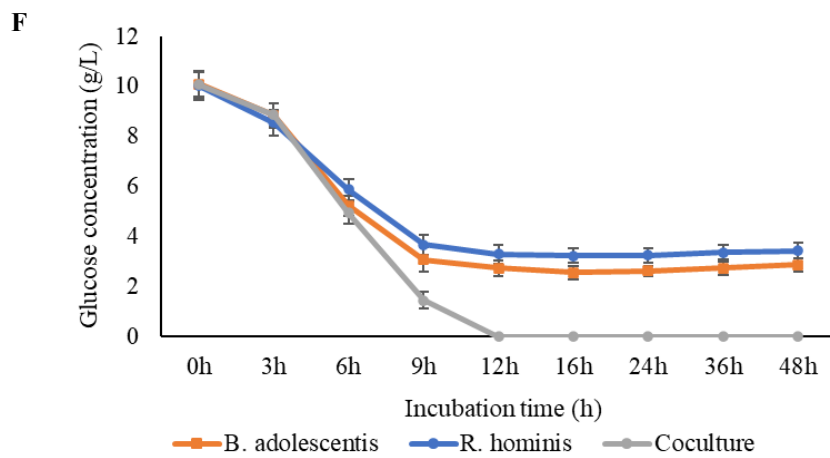

**Figure S2. Growth and production of short-chain fatty acids (SCFAs) during cultivation of *Bifidobacterium adolescentis* (BA) and *Roseburia hominis* (RH) on glucose.** (A) Cell concentration by qPCR-analysis for BA and RH in mono- and cocultures. (B) Relative strain abundance (%) in the coculture. (C) The BA mono-cultivation (in the medium for colon bacteria, MCB). (D) The RH mono-cultivation (in the modified medium for colon bacteria, mMCB). (E) The cocultivation of RH and BA (in MCB). (F) Consumption of glucose in the mono- and cocultures. RecA (for BA) and rho (for RH) genes were used as markers in the qPCR-analysis to determine the cell concentration, expressed as log (copy number/mL) in the mono- and cocultures. The sum of calculated gene copy number values was used to determine the relative population (%) of RH and BA in the cocultures. The optical density (OD) was determined at 600nm. The amount of glucose and SCFAs was determined by HPLC.

**Figure S3**

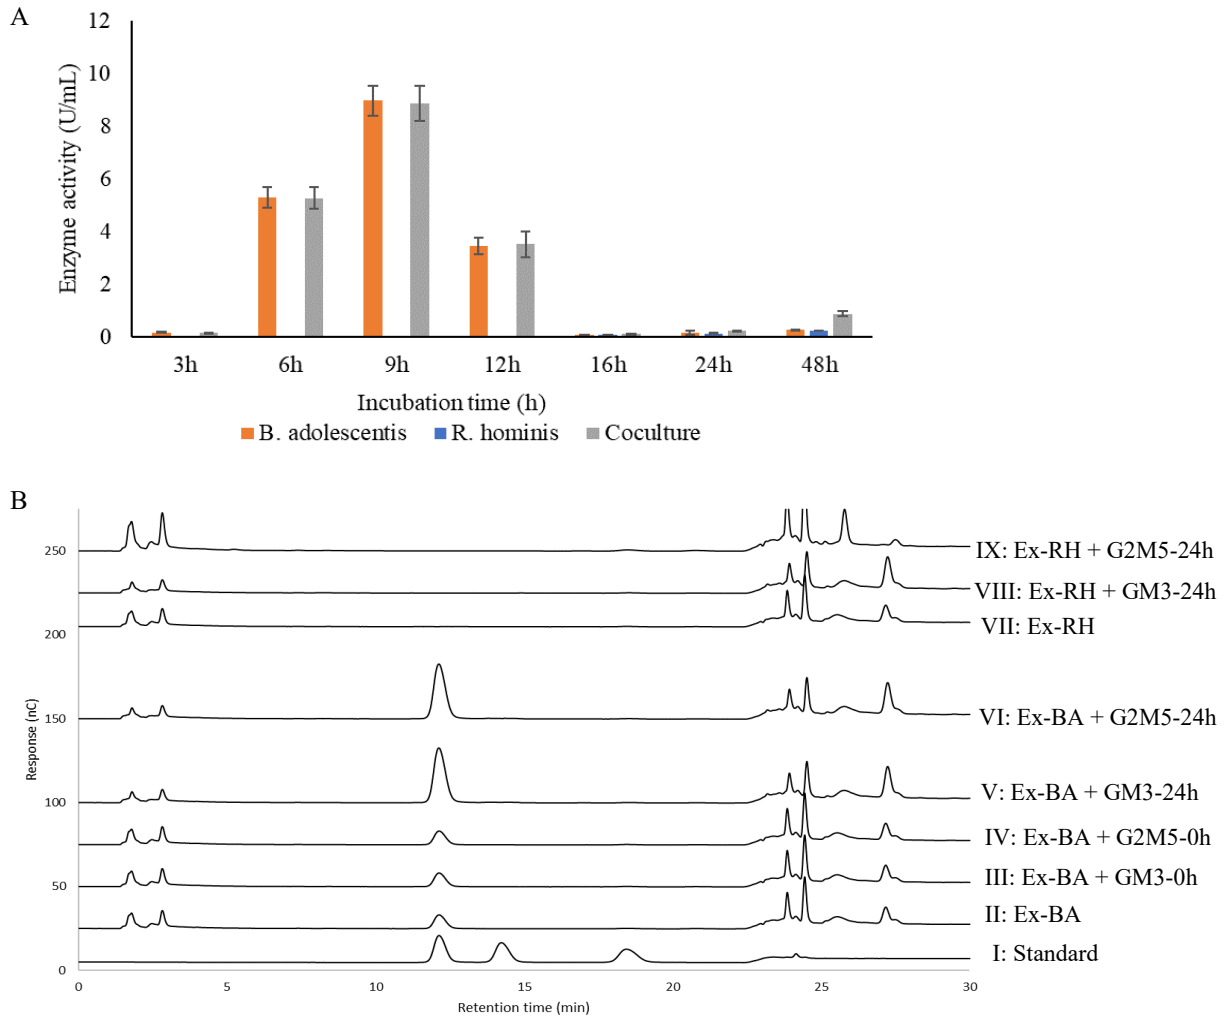

**Figure S3. Determining the extracellular (Ex)  $\alpha$ -galactosidase activity in *B. adolescentis* (BA) and *R. hominis* (RH). (A)  $\alpha$ -galactosidase activity assay. (B) Galactose release estimation by HPAEC-PAD analysis.**

**A.** The activity assay was carried out by incubation of the extracellular fraction (Ex) (9 h) of *B. adolescentis* and *R. hominis* and coculture with pNP- $\alpha$ -galactopyranoside (1 mM) for 10 min at 37 °C.

**B.** The extracellular fraction (Ex) (9 h) of *B. adolescentis* (BA) and *R. hominis* A2-183 (RH) was incubated separately with either galactosyl-mannotriose (GM3) or di-galactosyl-mannopentaose (G2M5) at 2.5 mM for 24 h at 37°C. The galactose release was measured by HPAEC-PAD using the CarboPac PA20 column as mentioned in Materials and Methods under subsection carbohydrate analysis.

Samples: I, Standards, II, the extracellular fraction of *B. adolescentis*; III, the extracellular fraction of *B. adolescentis* + GM3-0h; IV, the extracellular fraction of *B. adolescentis* + G2M5-0h; V, the extracellular fraction of *B. adolescentis* + GM3-24h; VI, the extracellular fraction of *B. adolescentis* + G2M5-24h; VII, the extracellular fraction of *R. hominis*; VIII, the extracellular fraction of *R. hominis* + GM3; IX, the extracellular fraction of *R. hominis* + G2M5.

Figure S4.

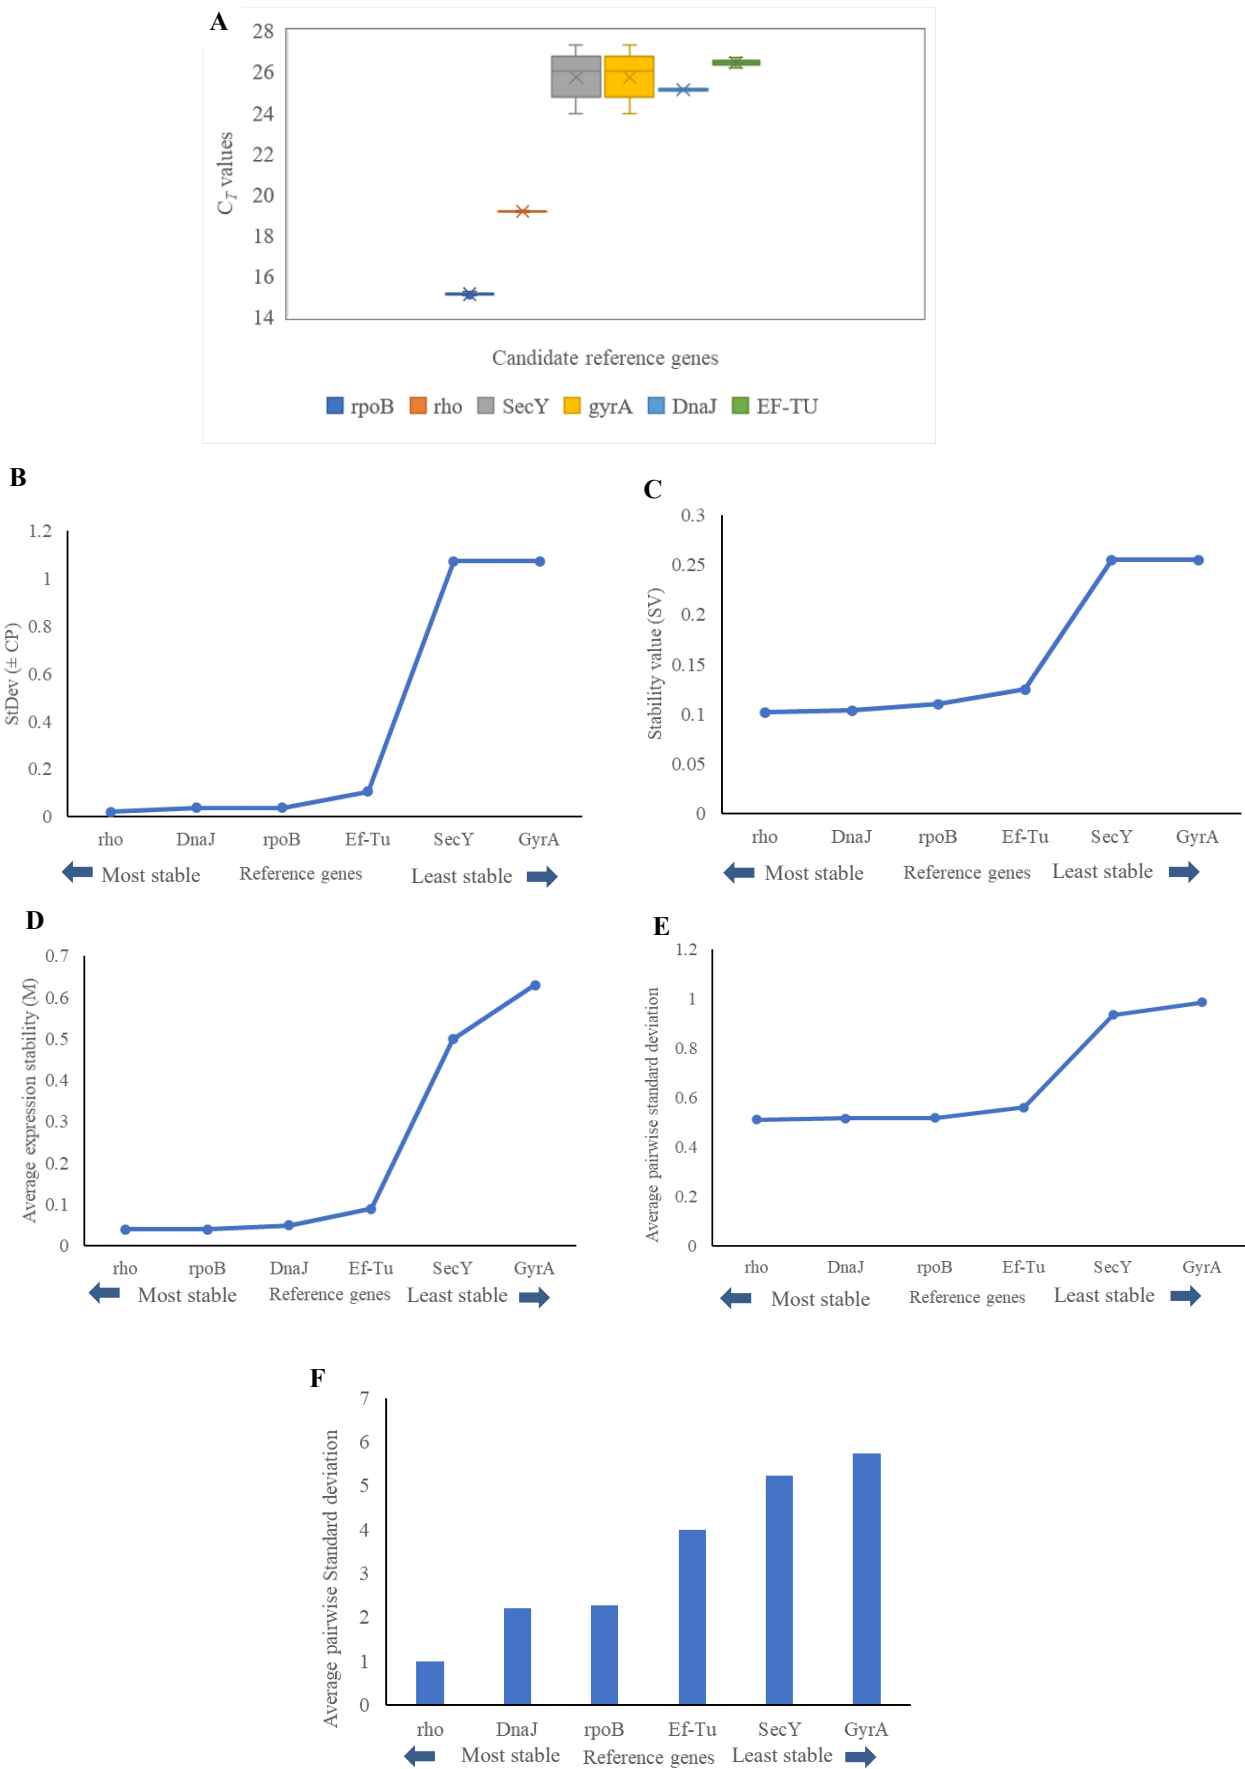

**Figure S4. Expression of reference genes and analysis of their stability in *R. hominis*.** (A) Gross expression data as  $C_T$  values for the candidate reference genes during cultivation of *R. hominis* on four different substrates (glucose, galactose, mannose and MOS/GMOS) and two different time points (9 and 12h). The data is represented as box and whisker plot where the line across the box depicts the median. The box indicates the 25th and 75th percentiles. Bars represent the maximum and minimum values.

The selection of the stable reference gene(s) was carried out by focusing on four different methods: (B) BestKeeper software, which ranks the genes in agreement with the standard deviation of their  $C_T$  values in correlation with intragroup alterations, (C) NormFinder software, which evaluates gene stability using both intragroup and intergroup changes, (D) geNorm software, which calculates the stability of each gene through intragroup differences and mean pairwise variation, (E)  $\Delta C_T$  method, which values the fluctuation of the  $\Delta C_T$  making a comparison between two or more reference genes.

The data were integrated to obtain a final rank, based on the geometric mean, using the (F) RefFinder tool.

Figure S5

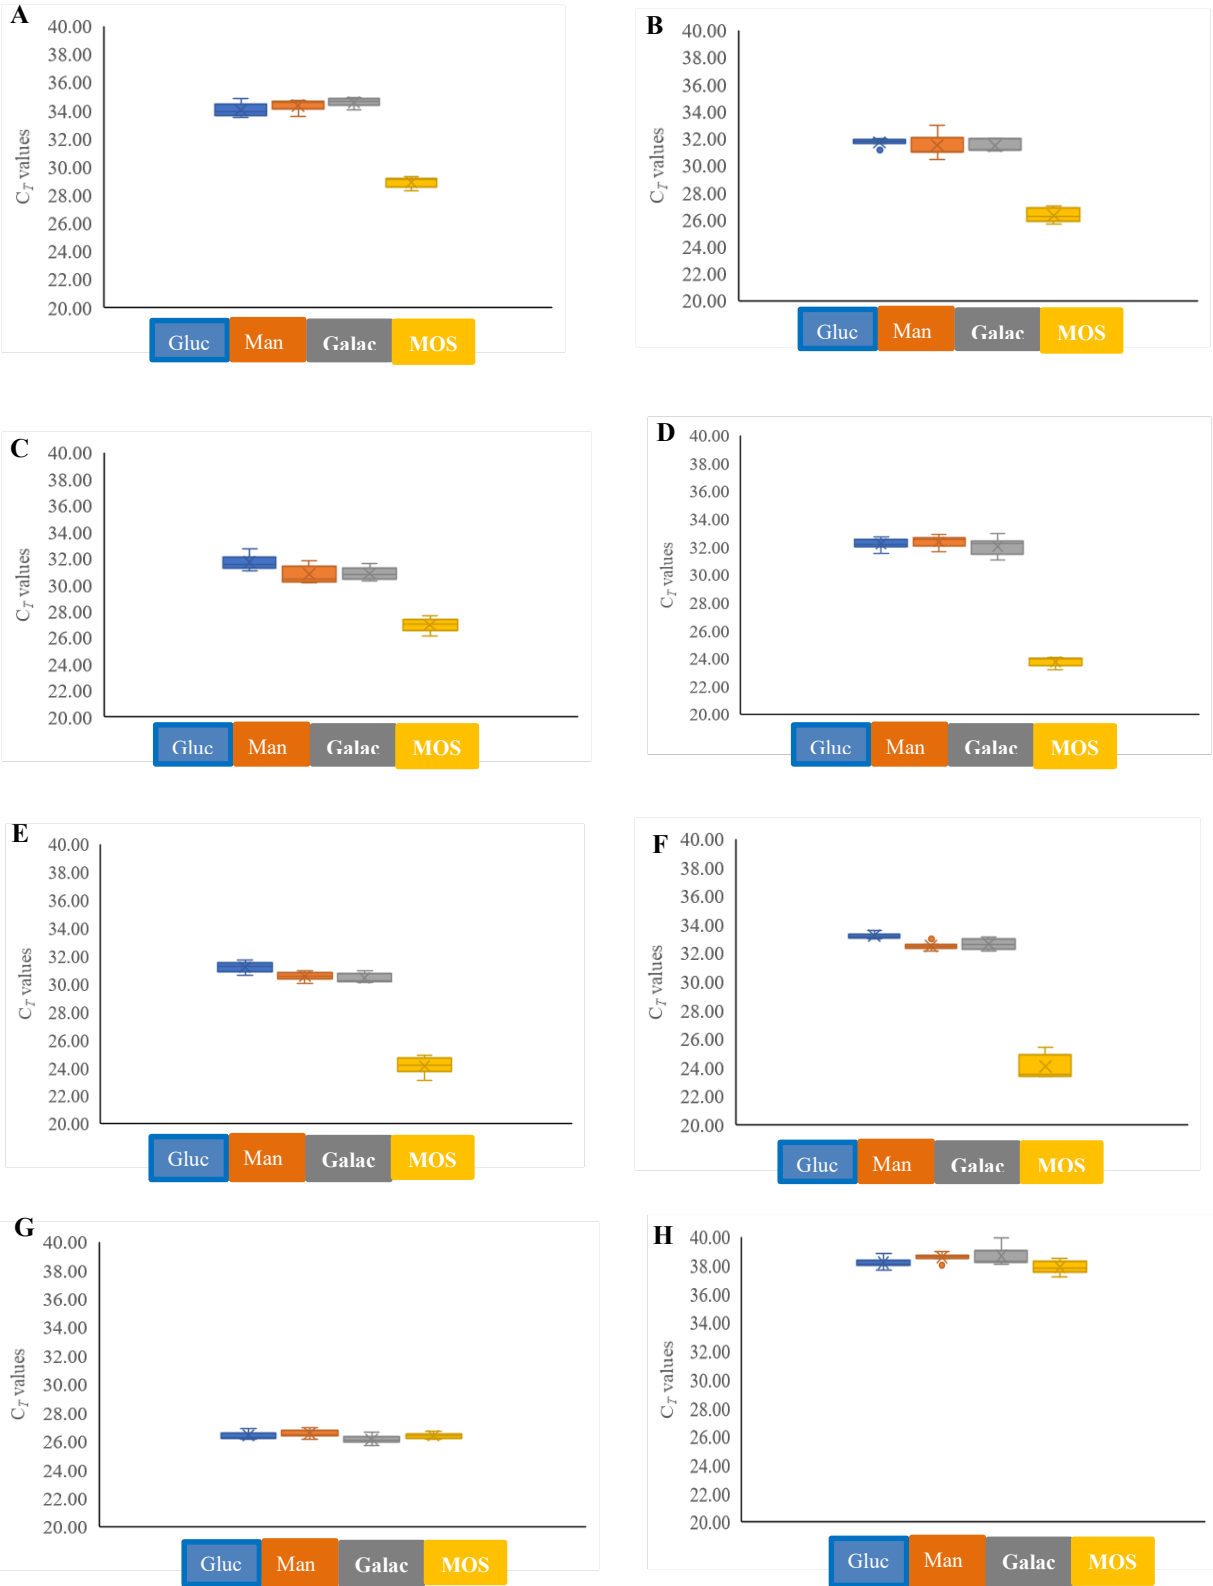

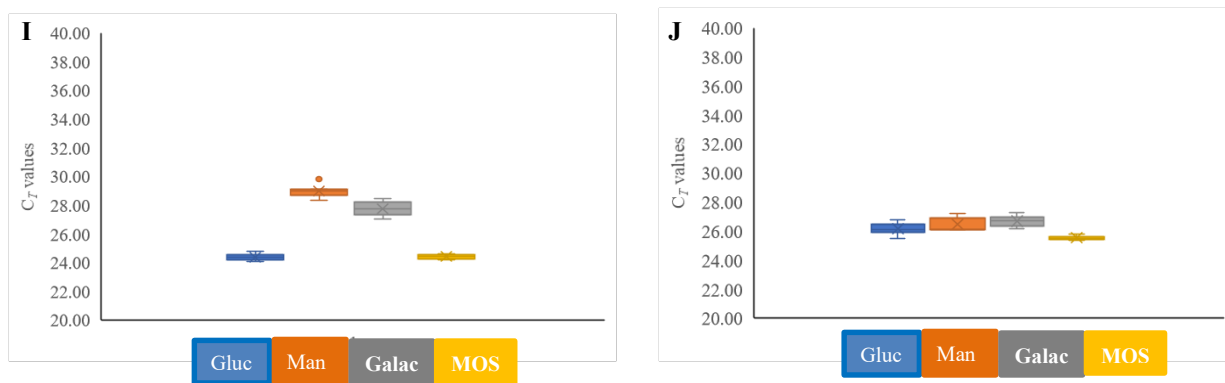

**Figure S5. Expression data represented as cycle threshold ( $C_T$ ) values determined using RT-qPCR for analysis of target genes during cultivation of *R. hominis* after 9 h of incubation.** The expression of target genes (putative gene function and GH family mentioned in bracket) were analysed during cultivation on four different substrates, glucose (Glu), mannose (Man), galactose (Galac) and MOS/GMOS (MOS), after 9 h of incubation. Target genes: (A) RHOM\_RS11135 ( $\beta$ -mannoside phosphorylase, GH130A); (B) RHOM\_RS11140 (4-O- $\beta$ -D-mannosyl-D-glucose phosphorylase, GH130); (C) RHOM\_RS11145 (mannobiose 2-epimerase); (D) RHOM\_RS11160 (ABC Substrate-binding protein); (E), RHOM\_RS11175 ( $\alpha$ -galactosidase, GH 36A); (F) RHOM\_RS14160 ( $\beta$ -mannoside hydrolase, GH 113A); (G) RHOM\_RS06295 ( $\alpha$ -galactosidase, GH36B); (H) RHOM\_RS05895 ( $\alpha$ -galactosidase, GH 27); (I) RHOM\_RS13400 (Butyl CoA: acetate CoA transferase); (J) RHOM\_RS15885 (Lactate dehydrogenase). The data are represented as a box and whisker plot where the line across the box depicts the median. The box indicates the 25th and 75th percentiles. Bars represent the maximum and minimum values. All experiments were carried out with three biological triplicates along with a technical duplicate of each biological replicate.

Figure S6

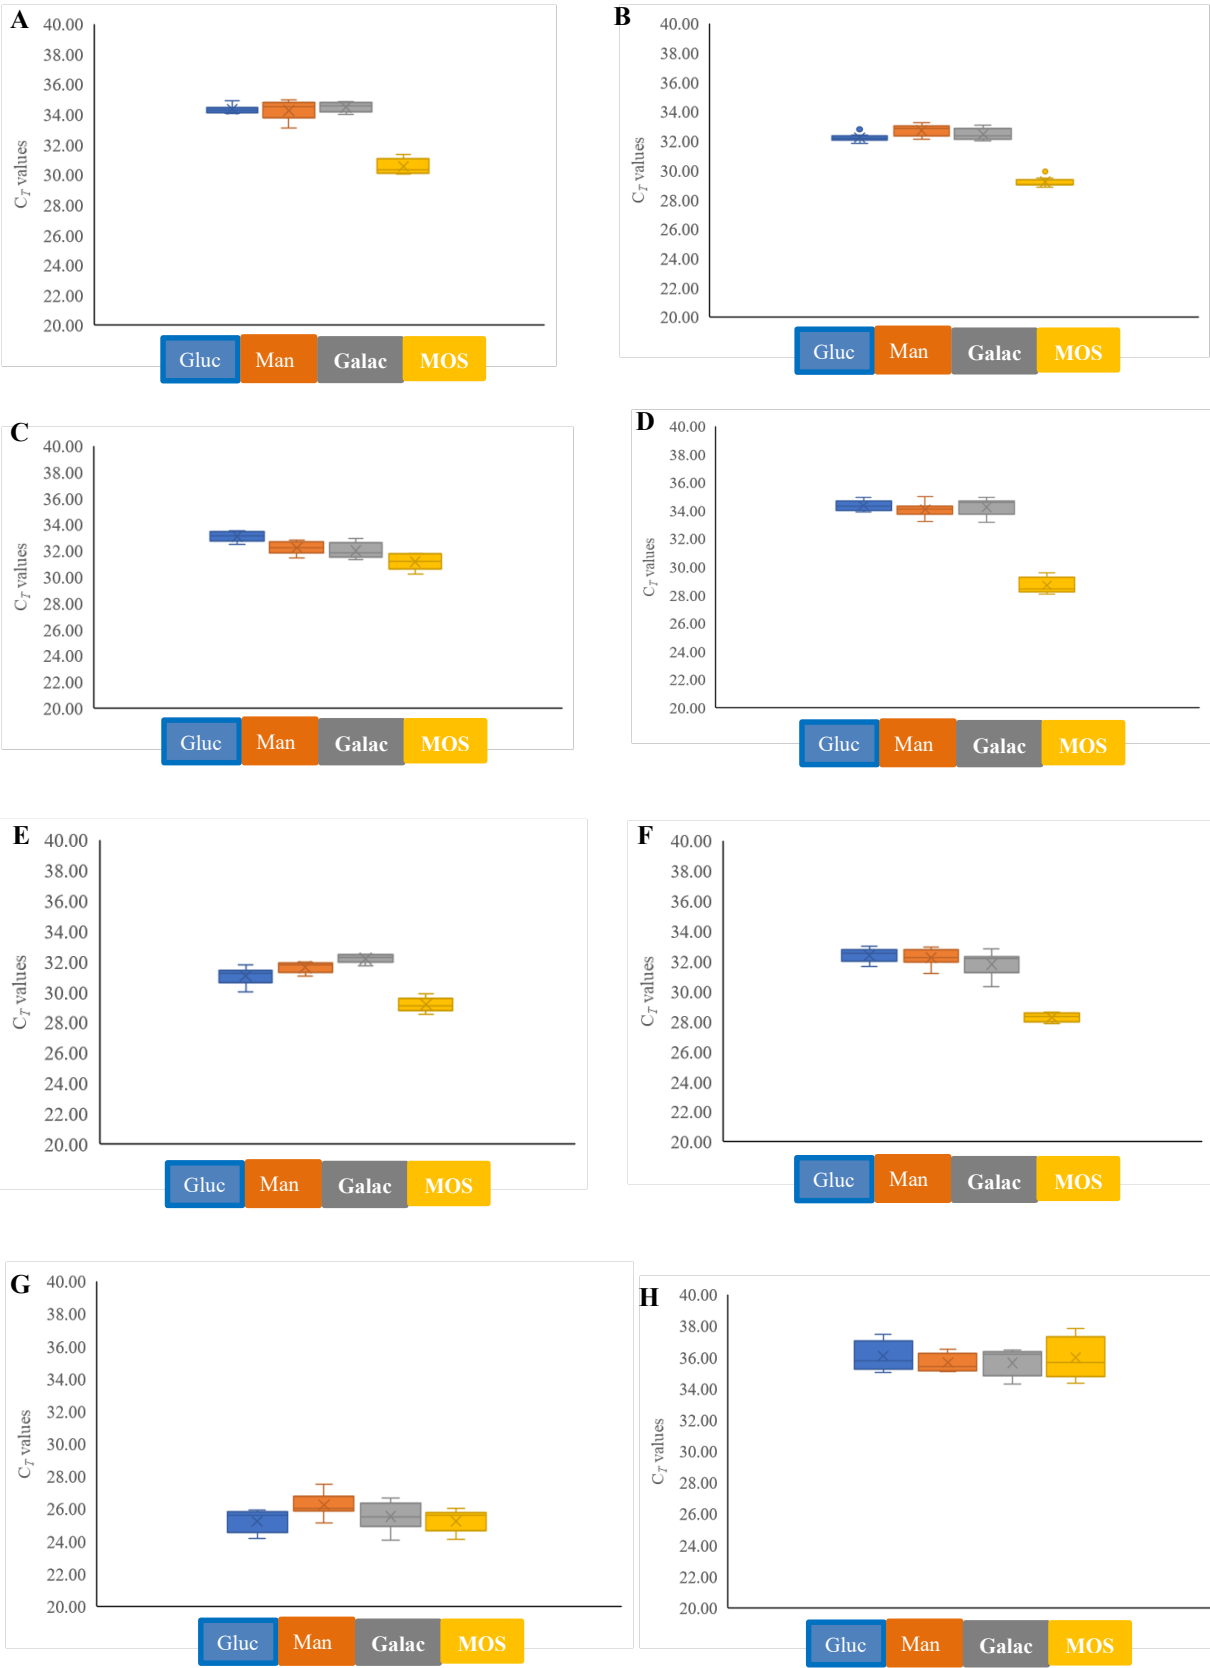



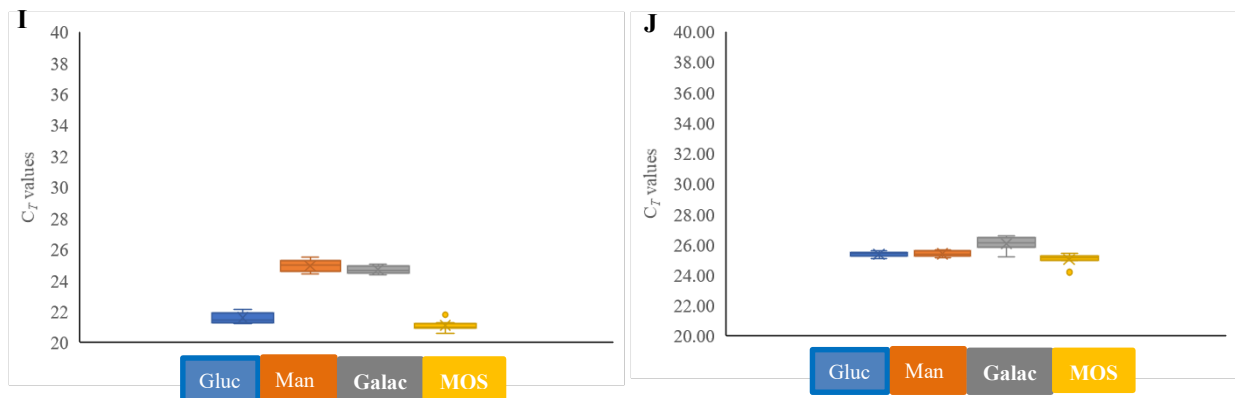

**Figure S6. Expression data represented as cycle threshold ( $C_T$ ) values determined using RT-qPCR for analysis of target genes during cultivation of *R. hominis* after 12 h of incubation.** The expression of target genes (putative gene functions and GH family mentioned in bracket) were analysed during cultivation on four different substrates, glucose (Glu), mannose (Man), galactose (Galac) and MOS/GMOS (MOS), after 12 h of incubation. Target genes: **(A)** RHOM\_RS11135 ( $\beta$ -mannoside phosphorylase, GH130A); **(B)** RHOM\_RS11140 (4-O- $\beta$ -D-mannosyl-D-glucose phosphorylase, GH130); **(C)** RHOM\_RS11145 (mannobiose 2-epimerase); **(D)** RHOM\_RS11160 (ABC Substrate-binding protein); **(E)**, RHOM\_RS11175 ( $\alpha$ -galactosidase, GH36A); **(F)** RHOM\_RS14160 ( $\beta$ -mannanase, GH113A); **(G)** RHOM\_RS06295 ( $\alpha$ -galactosidase, GH36B); **(H)** RHOM\_RS05895 ( $\alpha$ -galactosidase, GH27); **(I)**; RHOM\_RS13400 (Butyl CoA: acetate CoA transferase); **(J)** RHOM\_RS15885 (Lactate dehydrogenase). The data are represented as a box and whisker plot where the line across the box depicts the median. The box indicates the 25th and 75th percentiles. Bars represent the maximum and minimum values. All experiments were carried out with three biological triplicates along with a technical duplicate of each biological replicate.

**Table S4. Top 3 BLASTp results for selected MOS/GMOS utilisation locus, *RhMosUL*, encoded protein sequences against the Protein Data Base (PDB).**

| <b><i>RhMOP130A</i></b> |          |               |            |                                          |                     |         |           |
|-------------------------|----------|---------------|------------|------------------------------------------|---------------------|---------|-----------|
| Protein Name:           | Seq ID % | Query Cover % | AA length: | Function:                                | Refseq ID:          | PDB ID: | GH family |
| tm1225                  | 61.54%   | 95%           | 338        | Beta-mannoside phosphorylase             | N.A                 | 1VKD    | GH130     |
| Uhgb_MP                 | 54.06%   | 93%           | 347        | Mannoside phosphorylase                  | N.A                 | 4UDK    | GH130     |
| RaMP2                   | 53.66%   | 94%           | 335        | Mannooligosaccharide (Mos) phosphorylase | WP_013496855.1      | 5AYD    | GH130     |
| <b><i>RhMan113A</i></b> |          |               |            |                                          |                     |         |           |
| <i>AxMan113A</i>        | 50.98%   | 96%           | 309        | Beta-1,4-mannanase                       | WP_015010951.1      | 5YLH    | GH113     |
| <i>BaMan113A</i>        | 43.31%   | 98%           | 348        | Endo-beta-1,4-mannanase                  | N.A                 | 7DV7    | GH113     |
| <i>AaManA</i>           | 40.26%   | 95%           | 343        | Endo-beta-1,4-mannanase                  | N.A                 | 3CIV    | GH113     |
| <b><i>RhGal36A</i></b>  |          |               |            |                                          |                     |         |           |
| <i>AgaB</i>             | 49.45%   | 99%           | 729        | Alpha-galactosidase                      | (genbank)AAG49421.1 | 4FNQ    | GH36      |
| <i>AgaA</i>             | 49.66%   | 99%           | 729        | Alpha-galactosidase                      | (genbank)AAG49420.1 | 4FNR    | GH36      |
| <i>AgaSK</i>            | 45.48%   | 99%           | 720        | Alpha-galactosidase domain               | N.A                 | 2YFN    | GH36      |

| <i>RhMosBP</i> * |        |     |     |                                  |     |      |             |
|------------------|--------|-----|-----|----------------------------------|-----|------|-------------|
| <i>B/MnBP1</i>   | 56.74% | 88% | 444 | Mos binding (of ABC transporter) | N.A | 6I5R | Not defined |
| <i>B/MnBP2</i>   | 55.82% | 86% | 427 | Mos binding (of ABC transporter) | N.A | 6FUV | Not defined |

\*Only two homologous sequences of *RhMosBP* fulfilling the selection criteria were identified in the PDB database. Sequence identities (Seq ID%) higher than 30% are presented. Query Coverage (Query Cover %) refers to query sequence overlap with the reference sequence. AA length refers to number of amino acids. Refseq, Genbank, and PDB entry numbers and -glycoside hydrolase (GH) family (for the enzymes according to CAZy database) are indicated if available

Figure S7

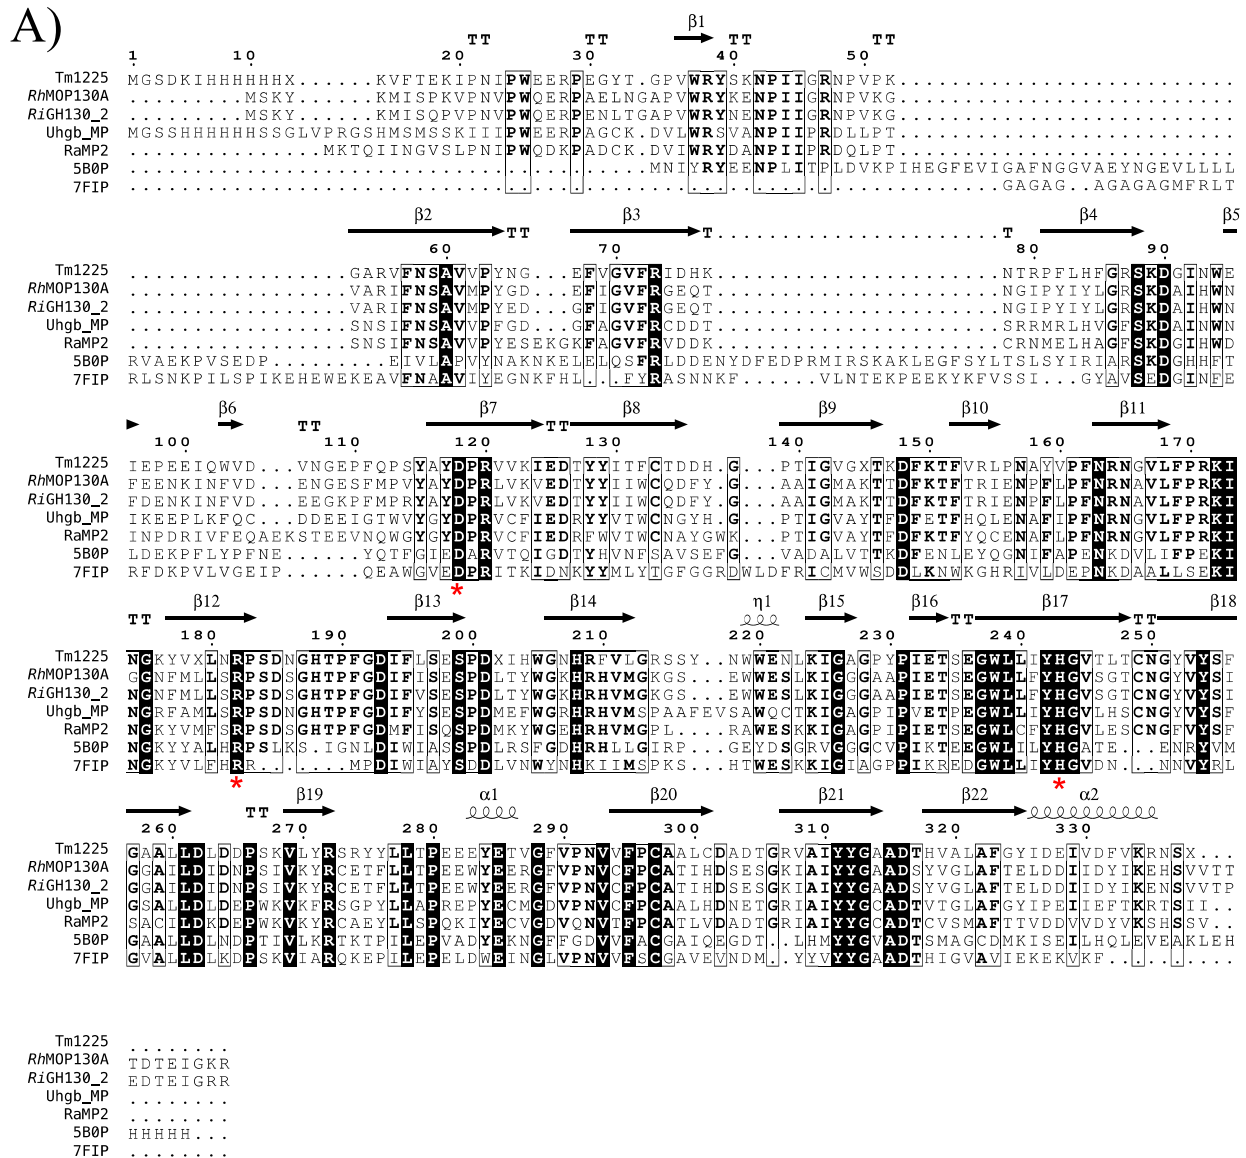



C)

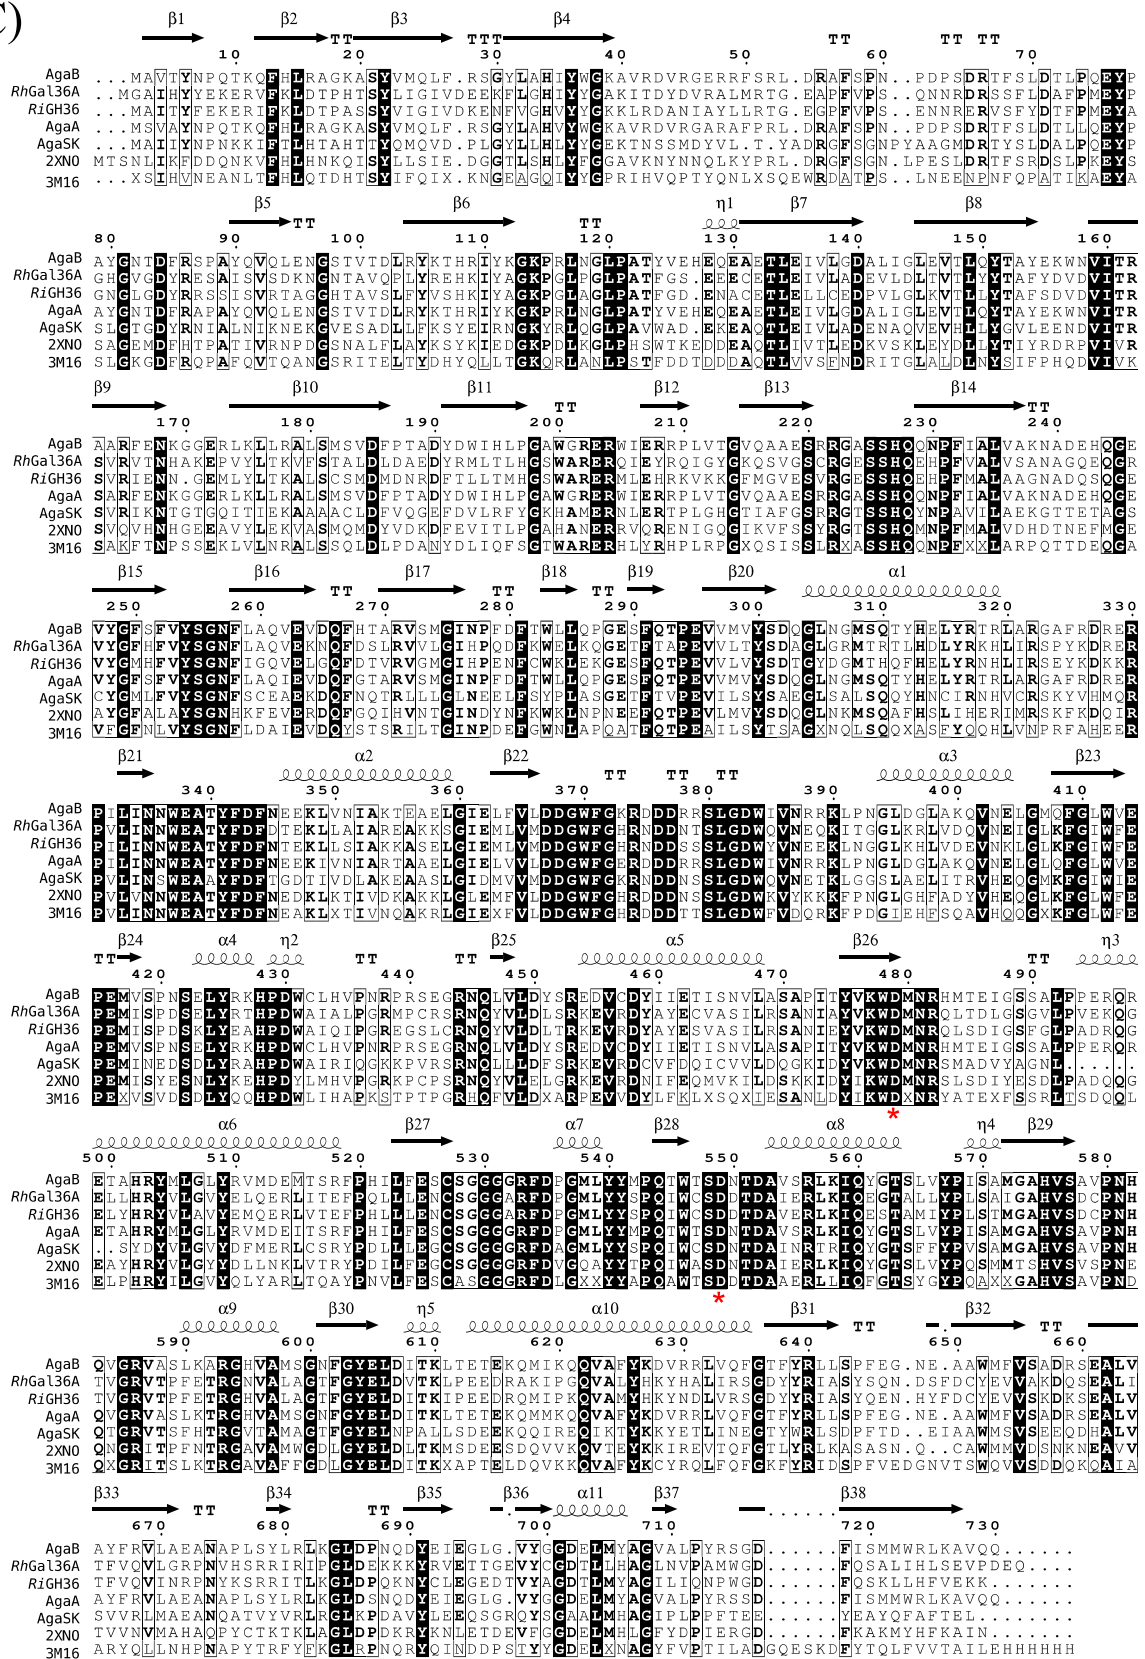

D)

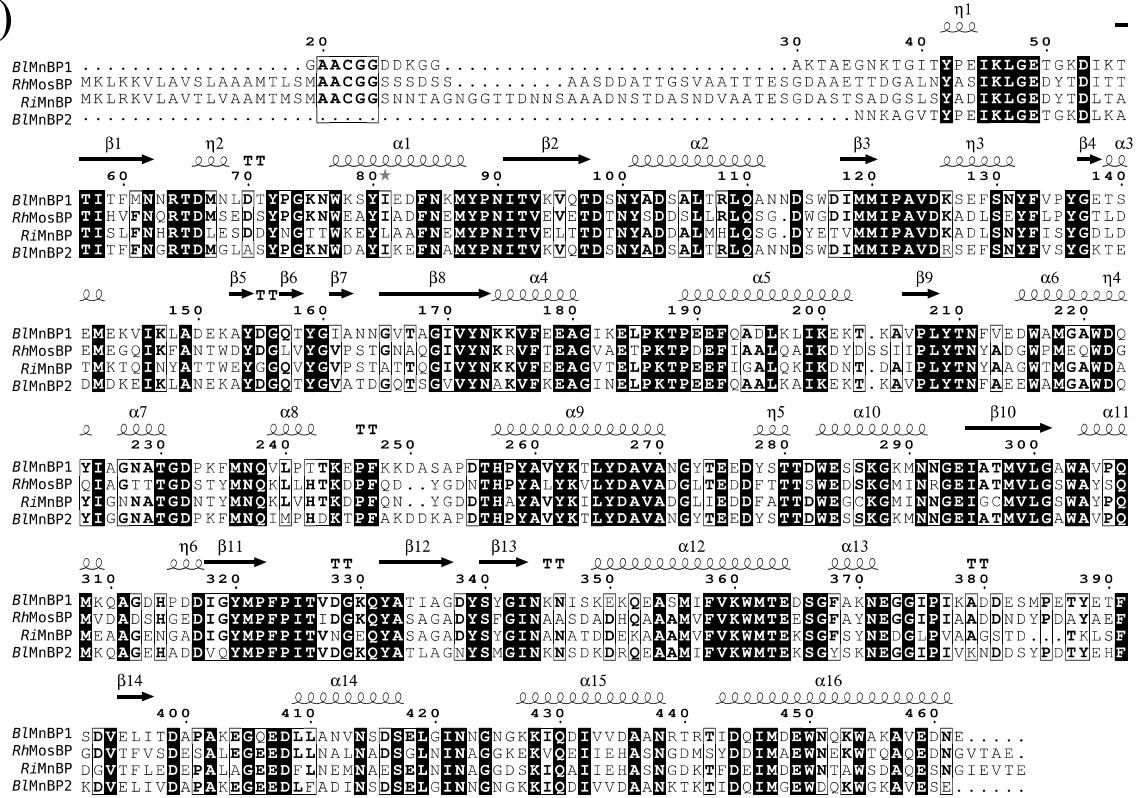

**Figure S7. Multiple Sequence Alignment (MSA) with selected *R. hominis* protein sequences, *R. intestinalis* homologs and proteins obtained by the BLASTp search of the PDB database as mentioned in Table S4.** Sequence alignment with Clustal Omega (<https://www.ebi.ac.uk/>). Conserved residues are highlighted in black (important functions marked with a star), and semiconserved (>50%) are boxed in black with conservations in bold. The order of sequences is: top hit in BLASTp, query sequence (*R. hominis* protein), *R. intestinalis* homolog, and remaining BLAST hits in order of highest identity. Amino acid numbering and secondary structure is indicated at the top of the sequence. **A:** MSA for *RhMOP130A*: catalytic residue (D104) and phosphate binding residues in Uhgb\_MP (R174 and H234) (pdb: 4UDK, Ladevése et al., 2013, Li et al 2022) are conserved in the sequences (D110, R174, H234 in *RhMOP130A* and D118, R182, H243 in tm1225). **B:** MSA for *RhMan113A*: catalytic residues E143 and E223 in *AxMan113A* (pdb: 5YLH, You et al 2018) are conserved in the sequences (E149, E229 in *RhMan113A*). **C:** MSA for *RhGal36A*: catalytic residues D479 and D549 in AgaB (pdb: 4FNQ, Merceron et al., 2012) are conserved in the sequences (D479 and D549 in *RhGal36A*). **D:** MSA for *RhMosBP*: several key residues for mannan binding in *BLMnBP1* (pdb: 6I5R, Ejby et al., 2019) are conserved. All three residues that contribute to hydrophobic stacking interactions with mannotriose (W216, W303, and Y339 in *BLMnBP1* corresponds to W235, W320, and Y356 in *RhMosBP*) and four (W283, E284, Q307, D338) out of the nine interacting polar residues are conserved.

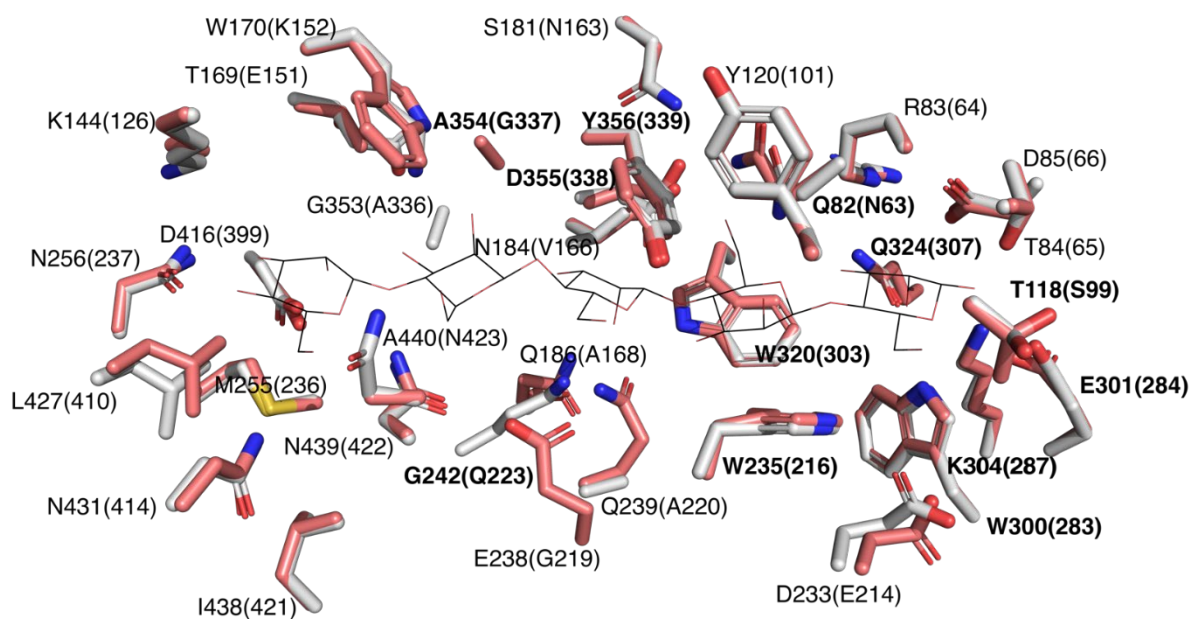

**Figure S8. Predicted mannan-oligosaccharide binding site of homology model generated for *RhMosBP* using *B/MnBP1* (pdb: 6I5R) as a template.** The homology model of *RhMosBP* (orange) is superimposed with the crystal structure (pdb: 6I5W) of *B/MnBP1* (grey) in complex with manno-pentaose (displayed with thin black lines). Side chains from either structure within 4Å of the ligand are presented. The residues are labelled with the residue in *RhMosBP* followed by the corresponding residue in *B/MnBP1* in parenthesis. Residues described as to contribute to substrate binding for mannotriose in *B/MnBP1* (Ejby et al 2019) are highlighted in bold. All 3 hydrophobic stacking residues are conserved between the structures (W235, W320, and Y356) as well as 4 (W283, E284, Q307, D338) of 9 residues that provide polar interactions. The remaining 5 residues are not judged to cause steric hindrance in mannan-oligosaccharide binding for *RhMosBP* and are variable between the MosBPs analysed in the MSA.



- A** MGMSKYKMISPKVPNPVWQERPAELNGAPVWRYKENPIIGRNPVKGVARIFNSAVMPYGDFIGVFRGEQTNGIPY  
IYLGRSKDAIHWNFEEKINFVDENGESFMPVYAYDPRLVKVEDTYIIWCQDFYGAAIGMAKTTFDKTFTRIENP  
FLPFNRNAVLFPRKIGGNFMLSRLSPSDSGHTPFGDIFISESPDLTYWGKHRHVMGKGSEWWESLKIGGGAAPIETS  
EGWLLFYHGVSGTCNGYVYSIGGAILDIDNPSIVKYRCETFLLTPEEWYEERGFPVNVCFPCATIHDSSESGKIAIY  
YGAADSYVGLAFTELDDIIDYIKEHSVVTTTDTEIGKRGGENLYFQGAAELALVPRGSSAHHHHHHHHHH
- B** MGMKIQNLGYIKGITFAPFHKRGSLSTQTARDSFDYMIHTAADFVILAPVGLQEHASSEEICYTSSATFSDEEL  
INMIRYAKSKSIRVALKPTVNCKNGVWRAYISFFEKDVPCPKWENWFASYTEFQTYAKIAEAEQCDLFIAGCEM  
VMTEHRSEEWNRVIAAIRNYHGPVSYNTDKYQEENVTWDCVDMISSGYYPIDQWEQELDRIVERVVQKFKKPF  
FAEAGCMSRKSSMVPNNWANQGALRLEEQPDWYRAMFEACAKRSWVNGFAMWEWAPVLPSTAAADTSYEICNK  
PVQEVIKDYGRDKRKAAAALEHHHHHH
- C** MGAIHYEYKERVFKLDTPHTSYLIGIVDEEKFLGHIYYGAKITDYDVRALMRTGEAPFVPSQNNRDRSSFLDAFPM  
EYPGHGVGDYRESAISVSDKNGNTAVQPLYREHKIYAGKPGLPGLPATFGSEEECETLEIVLADEVLDLTVTLYYT  
AFYDQDVITRSVRVTNHAKFVYLTQVSTALDLDAEDYRMLTLHGSHWARERQIEYRQIGYKQSVGSCRGESSHQ  
EHPFVALVSANAGQEQGRVYGFHFVYSGNFLAQVEKNQFDSLRLVGLIHPQDFKWELKQGETFTAPEVVLTYSDAG  
LGRMTRTLHDLYRKHLIRSPYKDRERPVLINNWEATYDFDTEKLLAIAREAKKSGIEMLVMDGWFGRNDNTS  
LGDWQVNEQKITGGLKRLVDQVNEIGLKFGIWFEPESISPDSELYRTHPDWAIALPGRMPCRSRNQYVLDLSRKEV  
RDYAYECVASILRSANIAYVKWDMNRQLTDLGSGVLPVEKQGELLHRYVLGVYELQERLITEFPQLLENCSSGGA  
RFDPGMLYYSPQIWCSDDDTAIERLKIQEGTALLYPLSAIGAHVSDCPNHTVGRVTPFETRGNVALAGTFGYELDV  
TKLPEEDRAKIPGQVALYHKYHALIRSGDYIRIASYSQNSDFDCYEVVAKDQSEALITFVQVLGRPNVHSRRIRIP  
GLDEKKKYRVETTGEVYCGDTLLHAGLNVPMWGFQSA- HLSEVPDEQAAAE
LALVPRGSSAHHHHHHHHHH

**Figure S9. The amino acid sequences of the studied protein constructs, A: *RhMOP130A*, B: *RhMan113A*, and C: *RhGal36A*.** Amino acids added to each respective native sequence have been underlined. A start codon and a glycine residue to adjust the reading frame was added to the sequences of **A** and **B**. The native stop codon was removed from each gene sequence and codons. Plasmid encoded His-tags (with preceding amino acids) were inserted (a His<sub>6</sub>-tag for B and a His<sub>10</sub>-tag for **A** and **C**).

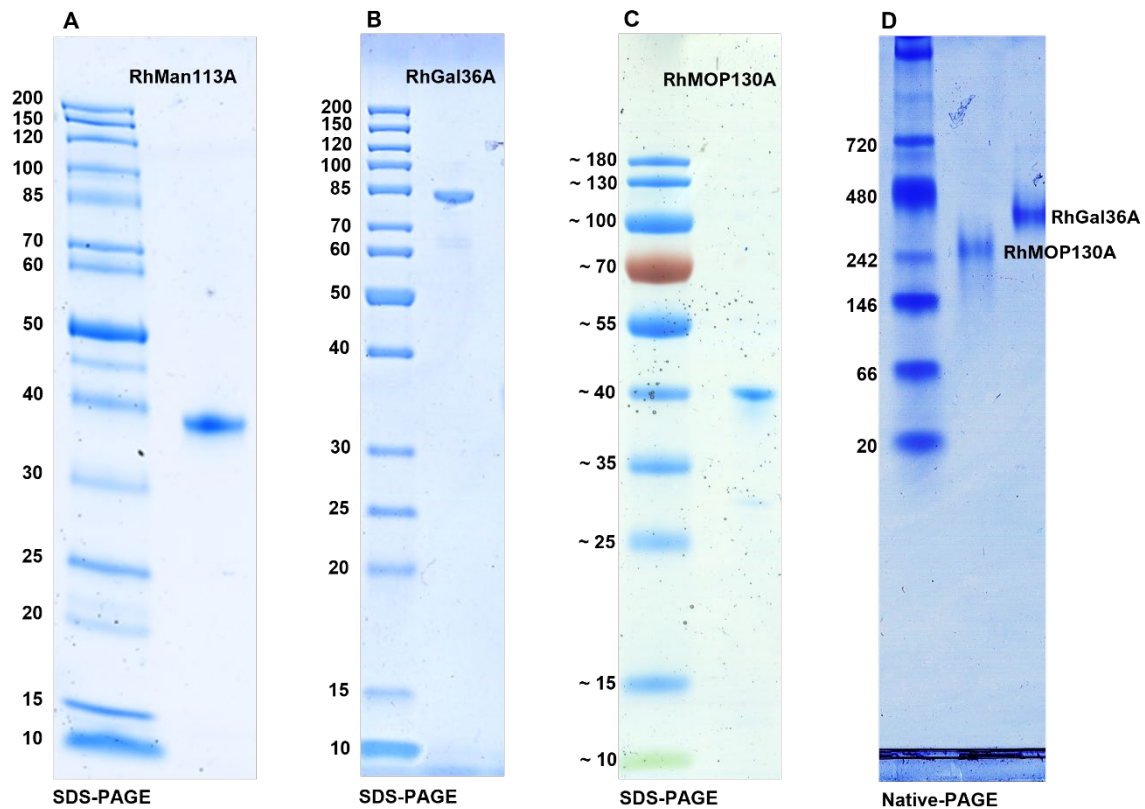

**Figure S10. Protein analysis by polyacrylamide gel electrophoresis.** Bands of protein ladders have been labelled with their sizes in kDa. The proteins migrated as expected approximately to the theoretical molecular weight of each respective construct (38.6 kDa for *RhMan113A*, 86.1 for *RhGal36A*, and 42.4 kDa for *RhMOP130A*) **A:** Purified *RhMan113A* (SDS-PAGE) with a visible a band at 38.3 kDa. **B:** Purified *RhGal36A* (SDS-PAGE) with a band at 86.7 kDa. **C:** *RhMOP130A* (SDS-PAGE) exhibits a band ~41 kDa, and **D:** native-PAGE of purified *RhGal36A* and *RhMOP130A*. The proteins migrated to approximately 346 kDa and 232 kDa in the native-PAGE. Lanes that are not relevant have been cut out from the gel.

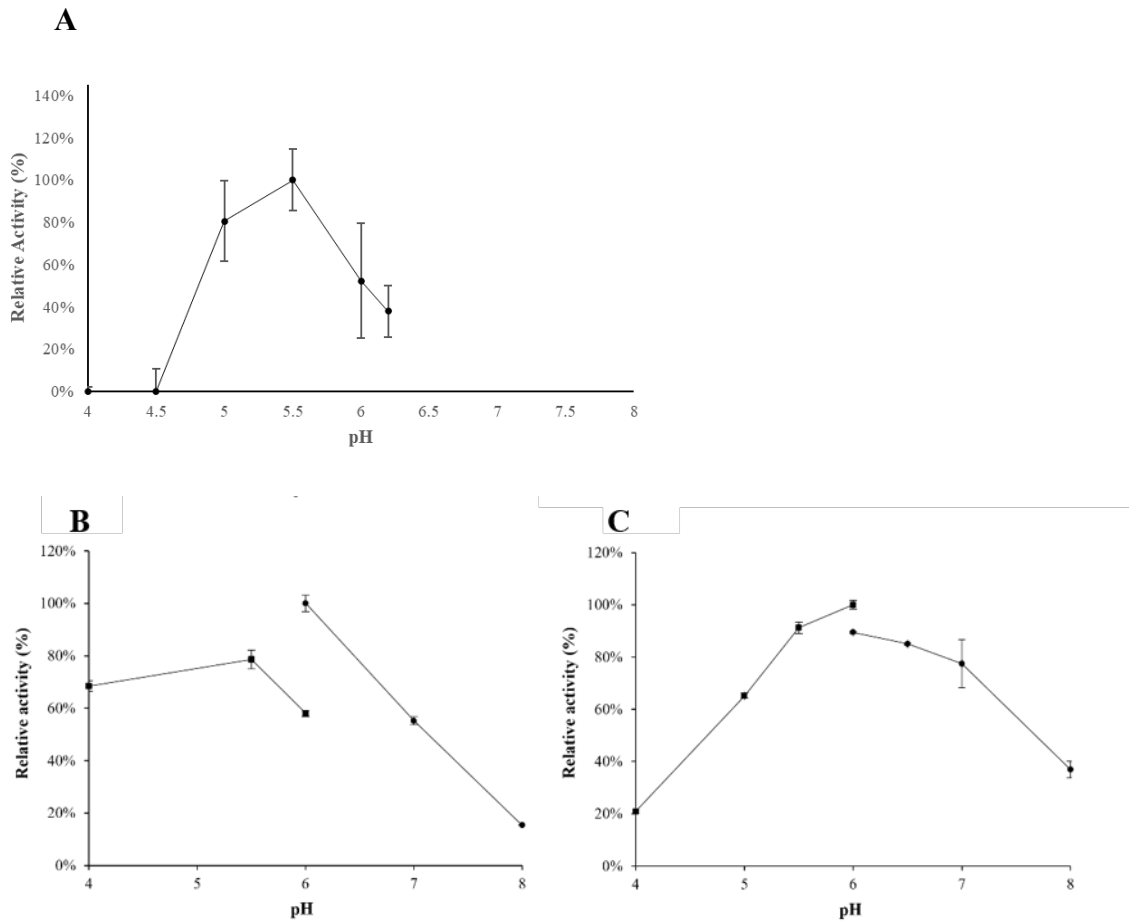

**Figure S11. The effect of pH on enzyme activity.** **A:** *RhMOP130A* (synthesis direction): determined by the phosphate release assay with M<sub>4</sub> after 10 min at 37°C in 50 mM sodium citrate from pH 4 to 6.2. **B:** *RhMan113A*: determined by measuring the mannose release when incubated with mannotetraose (M<sub>4</sub>) for 30 min at 30°C in 50mM sodium citrate buffer (pH 4-6) and sodium phosphate buffer (pH 6-8). **C:** *RhGal36A*: determined by pNP-gal hydrolysis after 10 min at 37°C and pH 4-8 in 50mM sodium citrate buffer (pH 4-6) and sodium phosphate buffer (pH 6-8).

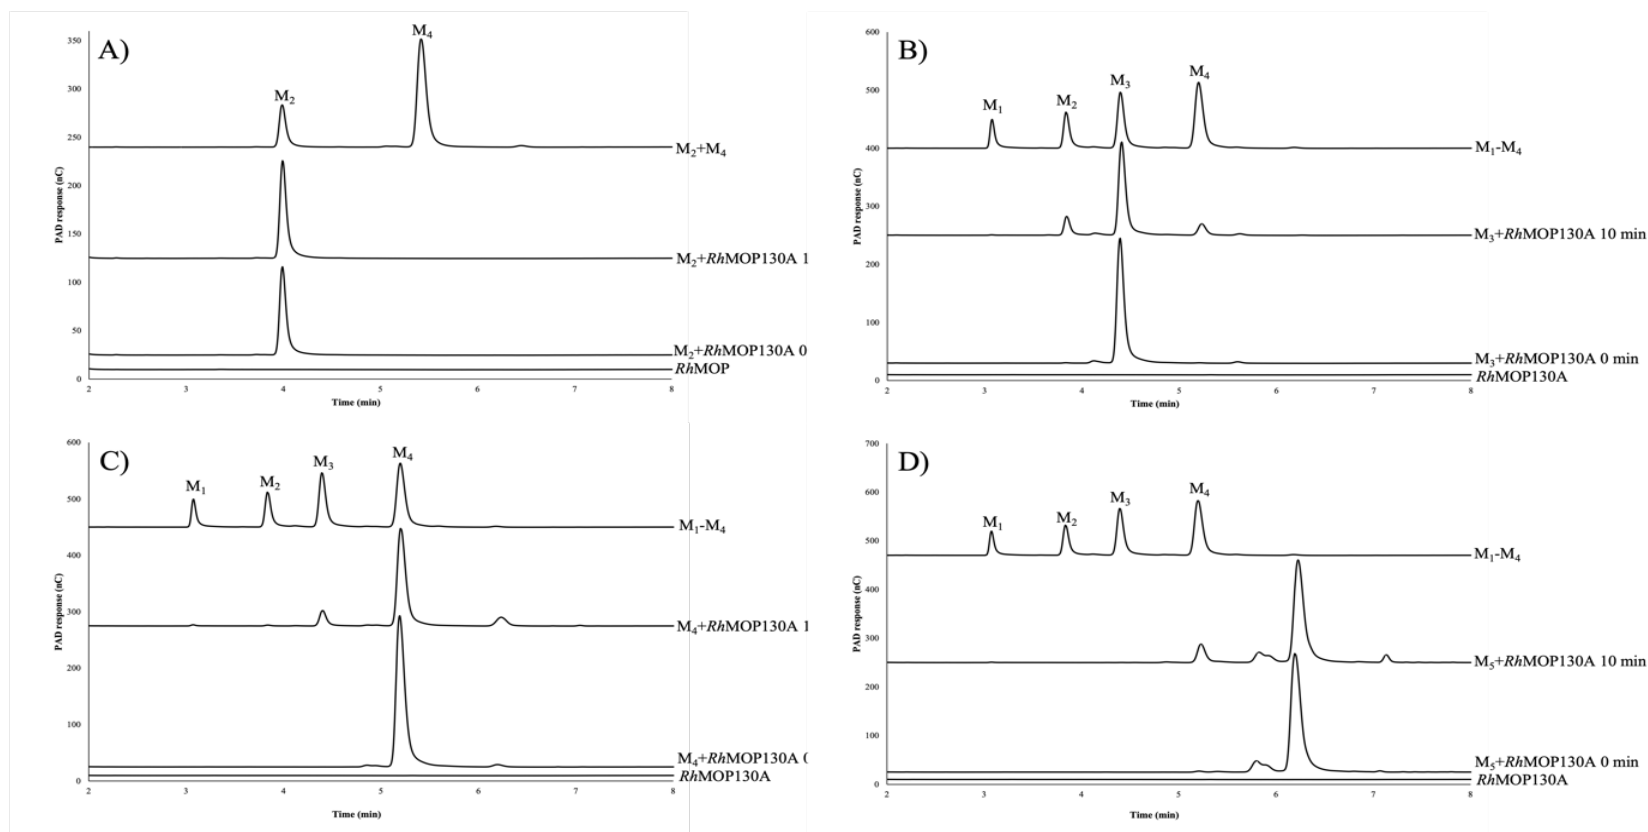

**Figure S12. *RhMOP130A* incubated with different mannan-oligosaccharides analysed by HPAEC.** Each incubation consisted of 0.14 mg/ml of *RhMOP130A*, 10 mM appropriate manno-oligosaccharide (mannobiose, M2, to mannotetraose, M4), and 10 mM phosphate in 100 mM sodium citrate, pH 6.0 for 10 minutes at 37 °C. Top chromatograms: M2 and M4 (A), control injections of M1 (mannose), M2, M3, and M4 (B, C, D). Middle chromatograms: *RhMOP130A* incubated with A: 10 mM of M2, B: 10 mM of M3, C: 10 mM of M4, D: 10 mM of M5. Bottom chromatograms: corresponding reactions terminated at 0 min.

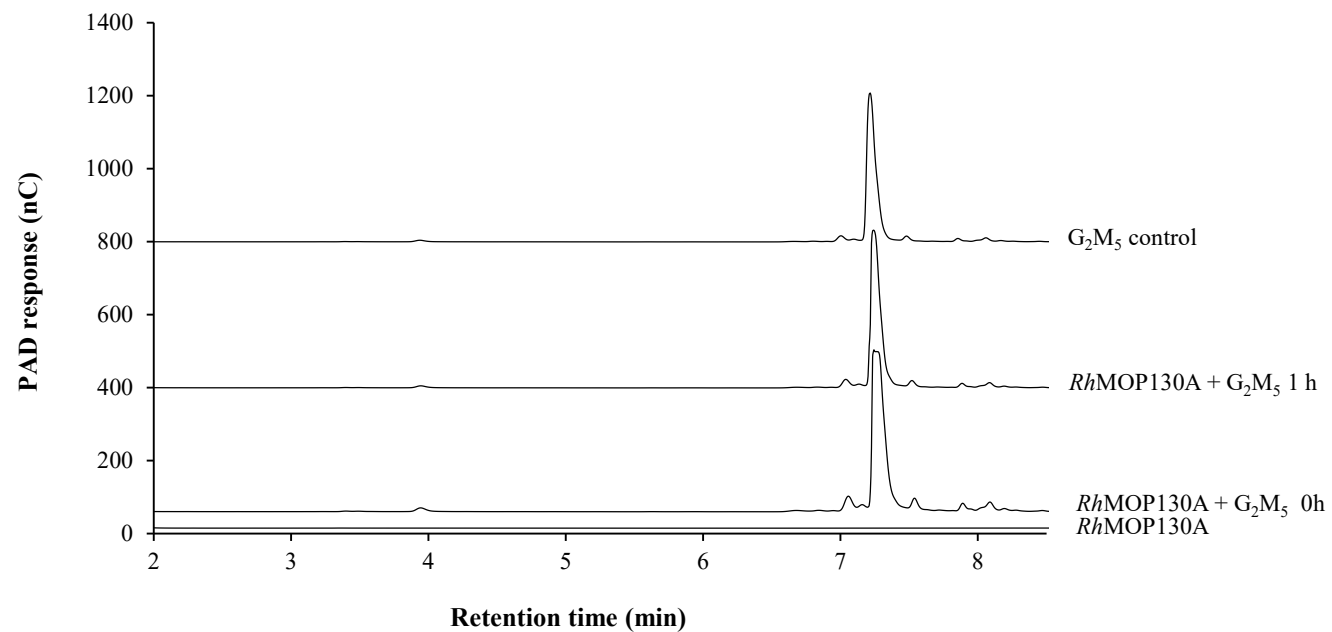

**Figure S13. *RhMOP130A* incubated with G<sub>2</sub>M<sub>5</sub> analysed on a PA200 column using HPAEC-PAD.** The mannan-oligosaccharide release of incubations with 0.14 mg/ml *RhMOP130A* incubated with 10mM di-galactosylated mannopentaose (G<sub>2</sub>M<sub>5</sub>) in 100 mM sodium citrate pH 6.0 at 37°C for 0-1 h. From top to bottom, the chromatograms in the figure are: control injection of 10  $\mu$ M G<sub>2</sub>M<sub>5</sub>, then the reaction with G<sub>2</sub>M<sub>5</sub> terminated after 24, 1, 0 h respectively, followed by an *RhMOP130A* enzyme control.

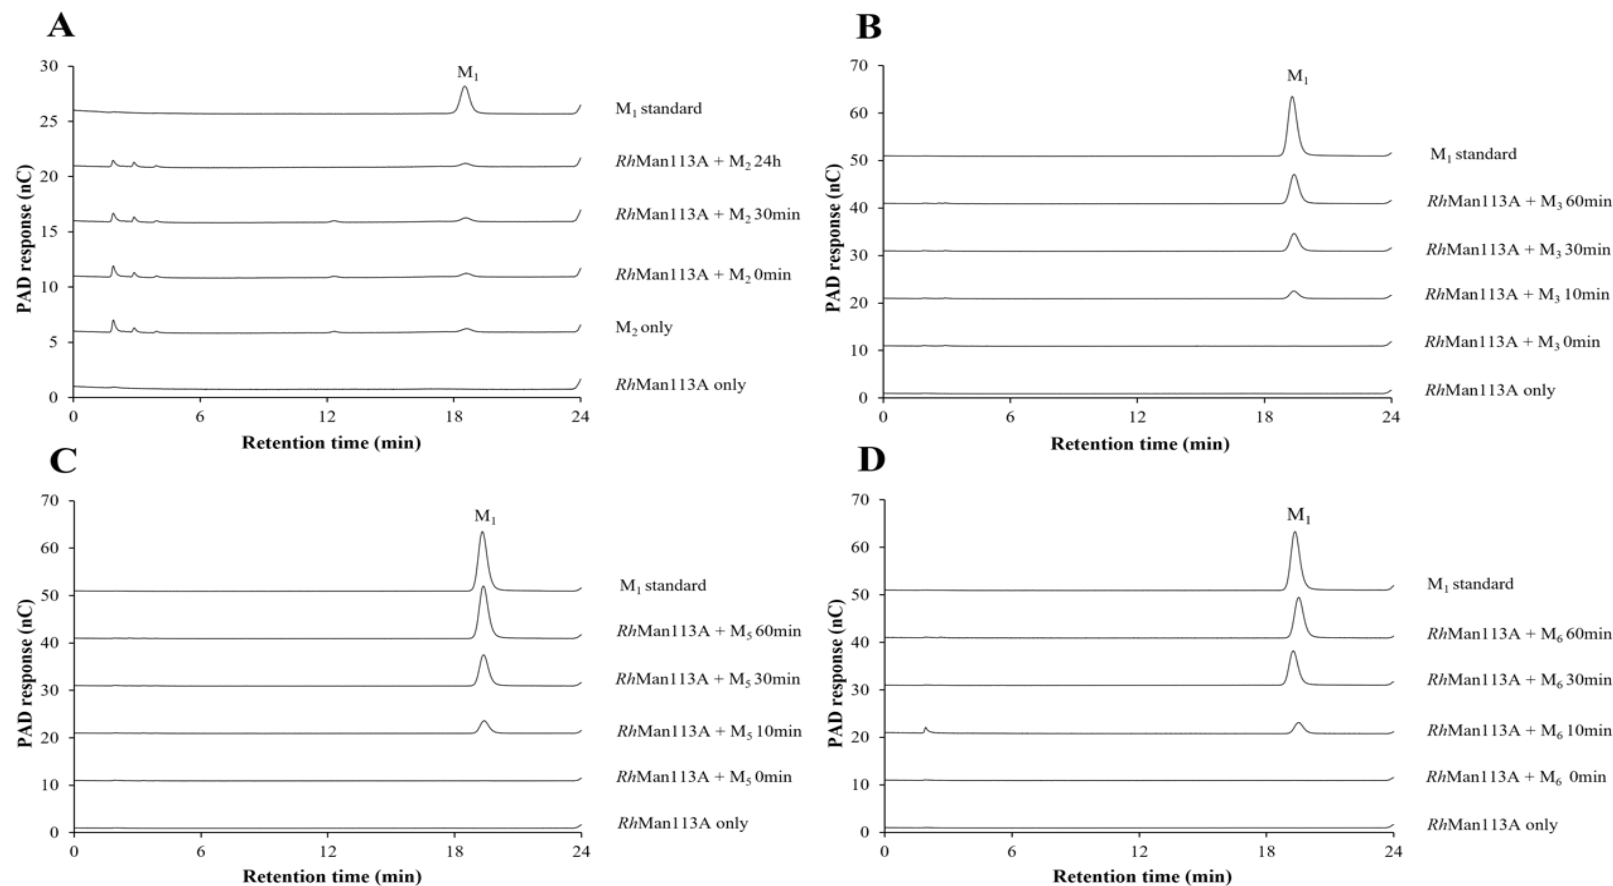

**Figure S14. HPEAC-PAD (PA20 column) analysis of the mannose release when *RhMan113A* (5 µg/ml) was incubated with 5 mM mannan-oligosaccharides.** A: mannobiose ( $M_2$ ), B: mannotriose ( $M_3$ ), C: mannopentaose ( $M_5$ ), and D: mannohexaose ( $M_6$ ). The reactions were performed in triplicates at 30°C in 50 mM sodium phosphate buffer pH 6. Aliquots from the reaction mixtures were collected and the reaction was terminated after 0-, 10-, 30-, and 60-minutes. Reaction time-points for incubation with  $M_2$  was 0-, 30 minutes, and 24 hours.

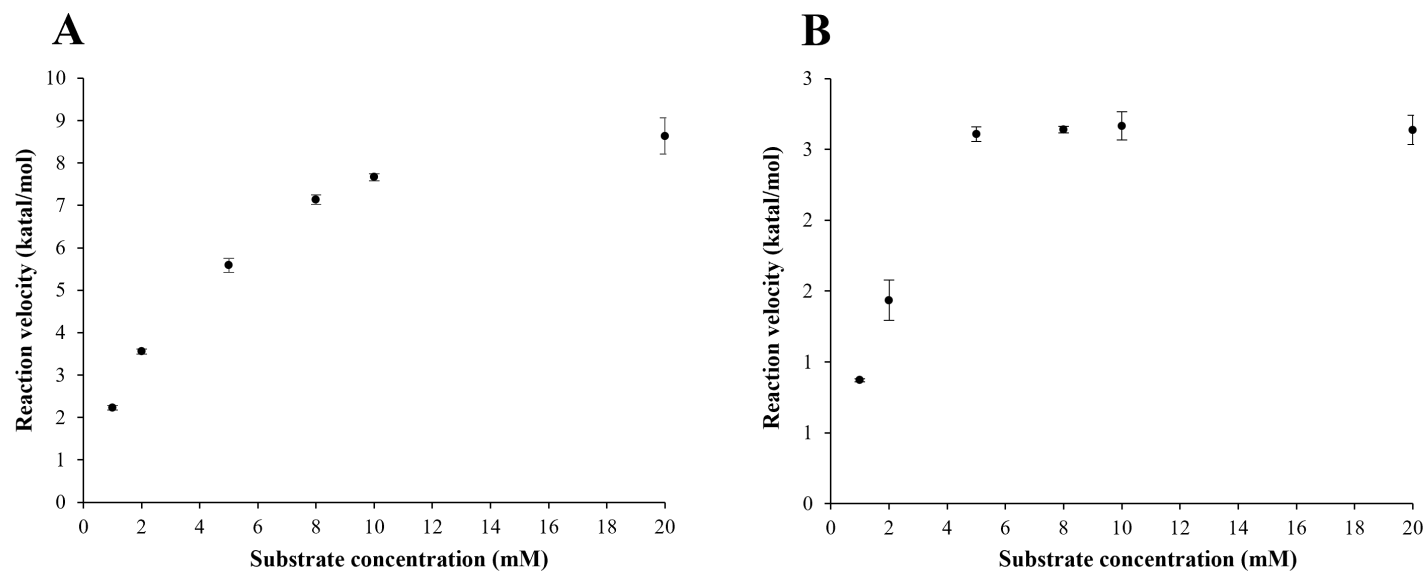

**Figure S15. Michaelis-Menten kinetics of *RhMan113A*.** A: mannotetraose (M<sub>4</sub>) and B: mannopentaose (M<sub>5</sub>). The incubations were performed in triplicates at 30°C and pH 6 using 5 µg/ml enzyme. The reactions were terminated after 30 minutes.

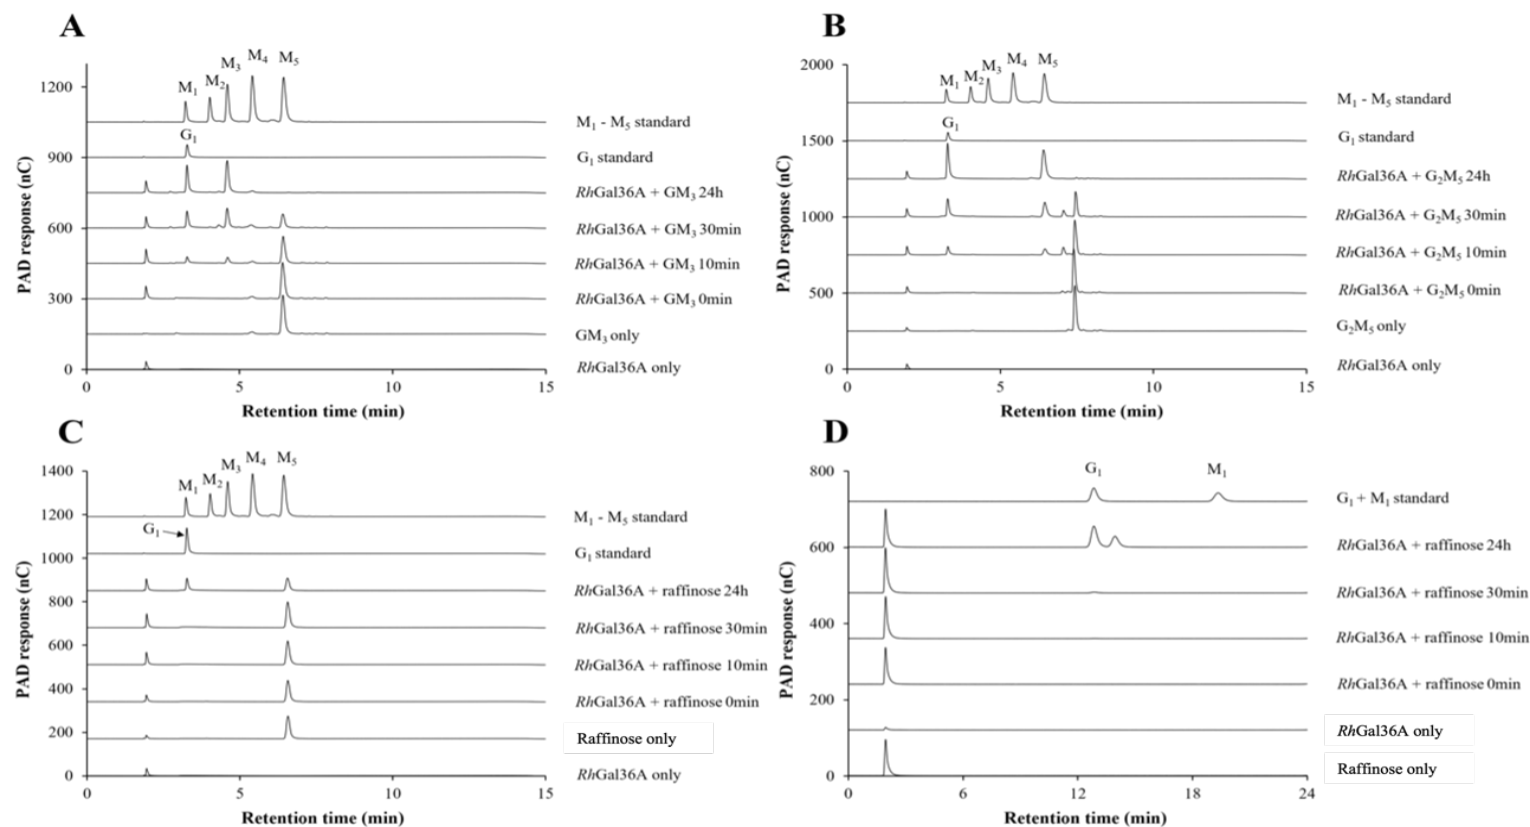

**Figure S16. Galactose release by *RhGal36A* when incubated with galactose-containing substrates.** All reactions were made in triplicates at 30°C in 50 mM sodium citrate buffer pH 5.5 using 5 µg/ml enzyme and 5 mM substrate. **A:** *RhGal36A* incubated with 6<sup>1</sup>-α-D-Galactosyl-mannotriose (GM<sub>3</sub>), **B:** *RhGal36A* incubated with 6<sup>3</sup>, 6<sup>4</sup>-α-D-Galactosyl-mannopentaose (G<sub>2</sub>M<sub>5</sub>), **C-D:** *RhGal36A* incubated with raffinose. Reactions aliquots were collected and terminated after 0-, 10-, 30 minutes, and 24 hours. Reaction products were analysed using HPAEC-PAD with a PA200 column (**A**, **B**, **C**) and a PA20 column (**D**).  $G_1$  indicates galactose (migrates as  $M_1$  with PA200 column). The  $G_1$  formation was confirmed by PA20-analysis for all incubations.



## Supplementary text

### S1. Pre-inoculum preparation

For the cultivation on glucose, the inoculum was prepared from the stock cultures of *B. adolescentis* and *R. hominis* by first inoculating (2%, v/v) into 7.0 mL of MCB or mMCB and incubated at 37 °C for 24 h. Next, 0.5% (v/v) inoculum of *B. adolescentis* or *R. hominis* from previous cultivation was inoculated into 10 mL of MCB or mMCB, followed by anaerobic incubation at 37 °C for 12 h. Subsequently, a second passage into the MCB or mMCB medium was carried out under the same conditions. Later, the third subculture of 1.5 % or 2.0 % (v/v) of *B. adolescentis* or *R. hominis*, respectively, was inoculated in the same medium and was incubated at 37 °C for 3 h. Subsequently, the optical density (OD) at 600 nm was determined to be 0.238 and 0.207 for *B. adolescentis* and *R. hominis*, respectively. 2.0% (v/v) of this inoculum was then used as pre-culture for inoculating the growth medium (100.0 mL) for either *B. adolescentis* on MCB or *R. hominis* on mMCB for monocultivations. For cocultivation, 2% (v/v) of both *B. adolescentis* and *R. hominis* were used as pre-culture for inoculating 100 mL of MCB.

For cultivation on MOS/GMOS, the inoculum was prepared as mentioned above, except during the third subculture, wherein, *B. adolescentis* and *R. hominis* were incubated for 6 h at 37 °C. The OD at 600 nm was determined to be 0.201 & 0.234 for *B. adolescentis* & *R. hominis*, respectively. 2.0% (v/v) of this inoculum was then used as a pre-culture for inoculating the monocultures and cocultures as mentioned above.

### S2. Gene copy number estimation

The gene copy number per mL was calculated using the following equation (1) (Whelan et al., 2003):

Equation 1:

$$\text{Gene copy number/mL} = \frac{6.02 \times 10^{23} \text{ (copy/mol)} \times \text{DNA amount (g)}}{\text{Length of amplicon (bp)} \times \text{average mass of one bp (g/mol)}}$$

Where the  $6.02 \times 10^{23}$  is the number of molecules per mole; the length of amplicon for *rpoB* and *recA* used as marker genes in *R. hominis* & *B. adolescentis* were 107 & 112 bp, respectively; the average mass of 1 bp was considered 660; the amount of DNA was determined as  $10^{(C_T - b/m)}$ , where 10 is the log quantity,  $C_T$  or cycle threshold value is obtained from qPCR run,  $b$  is the intercept from the standard curve and  $m$  is the slope from the standard curve.

Furthermore, the  $E$  value (PCR amplification efficiency) for each primer set was determined (target and reference genes) based on a qPCR assay with 10-fold serial dilution of amplification products (4.0 ng to 4.0 pg) and plotting the logarithm of the concentrations as a linear function of  $C_T$  values.  $E$  values were calculated as  $10^{-1/\text{slope}}$  using the slope of each standard curve.

## References for supplementary material

*(The references are also given in main text)*

La Rosa, S.L.; Leth, M.L.; Michalak, L.; Hansen, M.E.; Pudlo, N.A.; Glowacki, R.; Pereira, G.; Workman, C.T.; Arntzen, M.; Pope, P.B.; et al. The Human Gut Firmicute *Roseburia Intestinalis* Is a Primary Degradator of Dietary  $\beta$ -Mannans. *Nat. Commun.* **2019**, *10*, 1–14, doi:10.1038/s41467-019-08812-y.

Bhattacharya, A.; Wiemann, M.; Ståhlbrand, H.  $\beta$ -Mannanase BoMan26B from *Bacteroides Ovatus* Produces Mannan-Oligosaccharides with Prebiotic Potential from Galactomannan and Softwood  $\beta$ -Mannans. *Lwt* **2021**, *151*, 112215, doi:10.1016/j.lwt.2021.112215.

Ladevéze, S.; Tarquis, L.; Cecchini, D.A.; Bercovici, J.; André, I.; Topham, C.M.; Morel, S.; Laville, E.; Monsan, P.; Lombard, V.; et al. Role of Glycoside Phosphorylases in Mannose Foraging by Human Gut Bacteria. *J. Biol. Chem.* **2013**, *288*, 32370–32383,

doi:10.1074/jbc.M113.483628

Li, A.; Benkoulouche, M.; Ladeveze, S.; Durand, J.; Cioci, G.; Laville, E.; Potocki-Veronese, G. Discovery and Biotechnological Exploitation of Glycoside-Phosphorylases. *Int. J. Mol. Sci.* **2022**, *23*, doi:10.3390/ijms23063043.

Merceron, R.; Foucault, M.; Haser, R.; Mattes, R.; Watzlawick, H.; Gouet, P. The Molecular Mechanism of Thermostable  $\alpha$ -Galactosidases AgaA and AgaB Explained by X-Ray Crystallography and Mutational Studies. *J. Biol. Chem.* **2012**, *287*, 39642–39652, doi:10.1074/jbc.M112.394114.

Ejby, M.; Guskov, A.; Pichler, M.J.; Zanten, G.C.; Schoof, E.; Saburi, W.; Slotboom, D.J.; Abou Hachem, M. Two Binding Proteins of the ABC Transporter That Confers Growth of *Bifidobacterium Animalis* Subsp. *Lactis* ATCC27673 on  $\beta$ -Mannan Possess Distinct Manno-Oligosaccharide-Binding Profiles. *Mol. Microbiol.* **2019**, *112*, 114–130, doi:10.1111/mmi.14257.

Whelan, J.A.; Russell, N.B.; Whelan, M.A. A Method for the Absolute Quantification of cDNA Using Real-Time PCR. *J. Immunol. Methods* **2003**, *278*, 261–269, doi:10.1016/S0022-1759(03)00223-0.
